# Supplementary material
Source: Royal Society of Chemistry journal article supplement (doi:10.1039/d6ob00533k)

## Mechanochemical Tuning of Pd(BIAN–NHC) Allyl/Cinnamyl Complexes for Enhanced Cross-Coupling

### *Electronic Supplementary Information*

Warda Parveen<sup>a</sup>, Farhat Shakeel<sup>b</sup>, Shehzad Muhammad Raffi<sup>a</sup>, Xiangqun Chi<sup>a\*</sup>, Bo Wang<sup>a\*</sup>

<sup>a</sup>College of Biological and Chemical Engineering, Shandong University of Science and Technology, Qingdao, 266590, P.R. China.

<sup>b</sup>Key Laboratory of Material Physics, Ministry of Education, School of Physics, Zhengzhou University, Zhengzhou 540001, P.R. China.

#### Table of Contents

|                                                                                     |   |
|-------------------------------------------------------------------------------------|---|
| 1. General Information.....                                                         | 1 |
| 2. Synthesis of BIAN-NHC-Salt.....                                                  | 2 |
| 3. Synthesis of Novel Pd(BIAN-NHC)Cl( $\eta^3$ -Allyl/Cinnamyl) Catalysts.....      | 3 |
| 4. General Procedure for mechanochemical Suzuki-Miyaura Cross-Coupling Reaction.... | 4 |
| 5. General Procedure for mechanochemical Buchwald-Hartwig Amination Reaction.....   | 5 |
| 6. NMR Spectra for All Compounds.....                                               | 6 |

## 1. General Information

All catalytic reactions proceeded smoothly under ambient air without requiring an inert atmosphere or energy-intensive conditions. Ball-milling experiments were conducted in a planetary mill, with operational frequencies ranging from 100 to 300 rpm, using zirconia (ZrO<sub>2</sub>) reactors (25 mL) loaded with milling bodies (Ø = 5 mm) of the same material. Unless otherwise specified, all chemicals were purchased from commercial sources and used without further purification at the highest available purity. NMR spectra (<sup>1</sup>H, 400/500 MHz; <sup>13</sup>C, 101/125 MHz) were recorded at 298 K on Bruker Advance spectrometers. Chemical shifts are referenced to residual solvent signals (CDCl<sub>3</sub>: δ 7.26 ppm for <sup>1</sup>H, δ 77.23 ppm for <sup>13</sup>C; C<sub>6</sub>D<sub>6</sub>: δ 7.16 ppm for <sup>1</sup>H, δ 128.39 ppm for <sup>13</sup>C). Coupling constants (J) are reported in Hz. Signal multiplicities are abbreviated as: s (singlet), d (doublet), t (triplet), q (quartet), m (multiplet).

## 2. Synthesis of BIAN-NHC-Diimine and BIAN-NHC-HCl Salt

### 2.1 Synthesis of 7,9-Bis(2,6-diisopropylphenyl)-7H-acenaphtho[1,2-d]imidazol-9-ium Chloride (1a)

A mixture of diimine (2.0 g) and chloromethyl ethyl ether (8 mL) in a 300 mL round-bottom flask was stirred at 100 °C for 24 h. After cooling to room temperature, diethyl ether (3 × 20 mL) was added. The resulting suspension was filtered through a porosity 3 glass frit. The crude product was triturated with anhydrous diethyl ether (3 × 20 mL) to afford the pure yellow solid (82% yield)<sup>1</sup>.

**<sup>1</sup>H NMR (400 MHz, CDCl<sub>3</sub>):** δ 12.11 (s, 1H), 7.39 (t, J = 7.5 Hz, 2H), 7.32–7.28 (m, 6H), 6.67 (d, JJ = 7.3 Hz, 2H), 3.09–2.85 (m, 4H), 1.89 (s, 2H) 1.31 (d, JJ = 6.8 Hz, 12H), 0.98 (d, J = 6.9 Hz, 12H).

**<sup>13</sup>C NMR (101 MHz, CDCl<sub>3</sub>)** δ 144.95, 142.75, 137.56, 132.31, 130.69, 130.14, 129.17, 128.37, 125.04, 122.99, 122.98, 29.42, 24.67, 23.57.

**Elemental Analysis:** Calcd for C<sub>37</sub>H<sub>41</sub>ClN<sub>2</sub>: C, 80.92; H, 7.52; Cl, 6.46; N, 5.10. Found: C, 80.99; H, 7.62; Cl, 6.58; N, 5.22.

## 2.2 Synthesis of 7,9-Bis-(2,4,6-tribenzhydrylphenyl)-7H-acenaphtho[1,2-d]imidazol-9-ium Chloride (1b)

Diimine (1.80 g, 1.35 mmol) was placed in an oven-dried reaction vessel. Degassed chloromethyl ethyl ether (4.0 mL) was added, and complete dissolution was observed at room temperature. The mixture was stirred at 100 °C for 24 h. After cooling to room temperature, the crude mixture was diluted with anhydrous diethyl ether (50 mL) and filtered through a pad of Celite (2 cm), washing with additional ether (3 × 10 mL). The crude product was purified by trituration with anhydrous diethyl ether (3 × 20 mL), affording the desired compound as a white crystalline solid (1.50 g, 80% yield)<sup>1</sup>.

**<sup>1</sup>H NMR (500 MHz, CDCl<sub>3</sub>):** δ 12.93 (s, 1H), 7.59 (d, J = 8.3 Hz, 2H), 7.22–6.79 (m, 46H), 6.64 (m, 12H), 6.43 (m, 8H), 6.14 (d, J = 6.9 Hz, 2H), 5.42 (s, 2H), 5.33–5.15 (s, 4H).

**<sup>13</sup>C NMR (101 MHz, CDCl<sub>3</sub>)** δ 147.35, 142.73, 141.49, 141.09, 140.65, 137.74, 131.41, 129.82, 129.42, 129.29, 129.26, 128.89, 128.51, 128.47, 128.09, 126.84, 126.74, 126.60, 126.50, 122.94, 122.08, 56.28, 51.70. .

**Elemental Analysis:** Calcd for C<sub>103</sub>H<sub>77</sub>ClN<sub>2</sub>: C, 89.76; H, 5.63; Cl, 2.57; N, 2.03. Found: C, 89.87; H, 5.23; Cl, 2.67; N, 2.13.

## 2.3 Synthesis of 7,9-Bis(2,6-dibenzhydryl-4-methylphenyl)-7H-acenaphtho[1,2-d]imidazol-9-ium Chloride (1c)

Diimine (1.80 g, 1.35 mmol) was placed in an oven-dried reaction vessel. Degassed chloromethyl ethyl ether (4.0 mL) was added, and complete dissolution was observed at room temperature. The mixture was stirred at 100 °C for 24 h. After cooling to room temperature, the crude mixture was diluted with anhydrous diethyl ether (50 mL) and filtered through a pad of Celite (2 cm), washing with additional ether (3 × 10 mL). The crude product was purified by trituration with anhydrous diethyl ether (3 × 20 mL), affording the desired compound as a white crystalline solid (1.50 g, 80% yield)<sup>2</sup>.

**<sup>1</sup>H NMR (400 MHz, CDCl<sub>3</sub>):** δ 12.36 (s, 1H), 7.60 (dd, J = 8.2, 4.0 Hz, 2H), 7.20–6.69 (m, 40H), 6.69–6.62 (m, 6H), 6.59 (s, 4H), 6.23 (d, J = 7.0 Hz, 2H), 2.28 (s, 6H).

$^{13}\text{C}$  NMR (101 MHz,  $\text{CDCl}_3$ )  $\delta$  142.88, 141.83, 141.62, 141.08, 140.69, 137.85, 130.86, 129.57, 129.46, 129.41, 129.25, 129.05, 128.60, 128.39, 128.20, 126.90, 126.76, 123.20, 121.93, 21.98.

**Elemental Analysis:** Calcd for  $\text{C}_{79}\text{H}_{61}\text{ClN}_2$ : C, 88.36; H, 5.73; Cl, 3.30; N, 2.61. Found: C, 88.46; H, 5.83; Cl, 3.45; N, 2.72.

### 3. General Procedure for the Synthesis of Novel Catalysts

#### 3.1 Synthesis of $[\text{Pd}(\text{BIAN-IPr})\text{Cl}(\text{Allyl})]$ Complex (2a)

A 4 mL vial equipped with a magnetic stirring bar was charged with BIAN-IPr·HCl (**1a**) (261 mg, 0.47 mmol, 2.0 equiv.) and  $\text{K}_2\text{CO}_3$  (130 mg, 0.97 mmol, 4.0 equiv.) in acetone (2 mL). The mixture was stirred at room temperature for 15 min.  $[\text{Pd}(\text{allyl})(\mu\text{-Cl})_2]$  (86.4 mg, 0.235 mmol, 1.0 equiv.) was added, and stirring was continued for 1 h. The solvent was removed under reduced pressure. The residue was dissolved in DCM, filtered through a silica gel/Celite pad, and eluted with DCM. After concentration *in vacuo*, the product was precipitated with n-hexane and isolated by decantation. Drying under high vacuum afforded the pure complex as an orange-yellow powder (96% yield)<sup>2-4</sup>.

$^1\text{H}$  NMR (500 MHz,  $\text{CDCl}_3$ ):  $\delta$  7.72 (d,  $J = 8.3$  Hz, 2H), 7.57 (m, 2H), 7.41 (d,  $J = 7.8$  Hz, 4H), 7.33 (m, 2H), 6.86 (d,  $J = 7.0$  Hz, 2H), 5.32 (s, 1H), 4.94 (m, 1H), 4.00 (d,  $J = 7.2$  Hz, 2H), 3.37 (dt,  $J = 13.3, 6.6$  Hz, 2H), 3.30 (d,  $J = 5.4$  Hz, 1H), 3.16 (m, 2H), 2.93 (d,  $J = 13.4$  Hz, 1H), 1.89 (d,  $J = 11.8$  Hz, 1H), 1.40 (d,  $J = 6.0$  Hz, 12H), 0.99 (d,  $J = 6.7$  Hz, 12H).

$^{13}\text{C}$  NMR (126 MHz,  $\text{CDCl}_3$ )  $\delta$  193.00, 146.41, 146.25, 140.37, 134.67, 134.67, 130.22, 129.92, 129.66, 127.78, 127.31, 126.30, 124.45, 124.19, 121.61, 114.47, 114.47, 53.42, 50.29, 28.71, 28.69, 25.82, 25.47, 23.83, 23.32.

**Elemental Analysis:** Calcd for  $\text{C}_{41}\text{H}_{52}\text{ClN}_2\text{Pd}$ : C, 68.90; H, 7.33; Cl, 4.96; N, 3.92; Pd, 14.89. Found: C, 68.98; H, 7.44; Cl, 4.99; N, 3.98; Pd, 14.96.

#### 3.2 Synthesis of $[\text{Pd}(\text{BIAN-IPr}^*)\text{Cl}(\text{Allyl})]$ Complex (2b)

A 4 mL vial equipped with a magnetic stirring bar was charged with BIAN-IPr\*·HCl (**1c**) (647 mg, 0.47 mmol, 2.0 equiv.) and  $\text{K}_2\text{CO}_3$  (130 mg, 0.97 mmol, 4.0 equiv.) in acetone (2 mL). The mixture was stirred at room temperature for 15 min.  $[\text{Pd}(\text{allyl})(\mu\text{-Cl})_2]$  (86.4 mg, 0.235 mmol, 1.0 equiv.)

was added, and stirring was continued for 1 h. The mixture was worked up as described for **2a**. The pure complex was obtained as an orange powder (97% yield).

**<sup>1</sup>H NMR (500 MHz, CDCl<sub>3</sub>):**  $\delta$  7.24 – 7.05 (m, 22H), 6.86 – 6.43 (m, 28H), 6.21 (s, 2H), 5.95 (s, 2H), 5.65 (d,  $J$  = 6.8 Hz, 2H), 5.37 (s, 1H), 4.61 – 4.57 (m, 1H), 2.41 (s, 6H), 0.90 (d,  $J$  = 6.9 Hz, 2H).

**<sup>13</sup>C NMR (101 MHz, CDCl<sub>3</sub>)**  $\delta$  191.11, 143.84, 140.52, 138.53, 135.54, 130.39, 129.57, 127.67, 126.06, 125.51, 124.71, 121.42, 114.74, 72.64, 53.17, 51.66, 21.95.

**Elemental Analysis:** Calcd. for C<sub>83</sub>H<sub>72</sub>ClN<sub>2</sub>Pd: C, 80.44; H, 5.86; Cl, 2.86; N, 2.26; Pd, 8.59.  
Found: C, 80.56; H, 5.78; Cl, 2.96; N, 2.36; Pd, 8.67.

### 3.3 Synthesis of [Pd(BIAN-IPr<sup>#</sup>)Cl(cinnamyl)] Complex (**2c**)

A 4 mL vial equipped with a magnetic stirring bar was charged with BIAN-IPr<sup>#</sup>·HCl (**1b**) (647 mg, 0.47 mmol, 2.0 equiv.) and K<sub>2</sub>CO<sub>3</sub> (130 mg, 0.97 mmol, 4.0 equiv.) in acetone (2 mL). The mixture was stirred at room temperature for 15 min. [Pd(cinnamyl)( $\mu$ -Cl)]<sub>2</sub> (122 mg, 0.235 mmol, 1.0 equiv.) was added, and stirring was continued for 1 h. The mixture was worked up as described for **2a**. The pure complex was obtained as an orange powder (97% yield).

**<sup>1</sup>H NMR (400 MHz, CDCl<sub>3</sub>):**  $\delta$  7.42 (m, 5H), 7.29 (s, 4H), 7.08 (m, 44H), 6.61 (m, 22H), 6.06 (s, 4H), 5.66 (d,  $J$  = 9.7 Hz, 2H), 5.57 (s, 2H), 4.89 (m, 1H), 4.47 (d,  $J$  = 14.7 Hz, 1H), 0.91 (t,  $J$  = 6.7 Hz, 1H).

**<sup>13</sup>C NMR (126 MHz, CDCl<sub>3</sub>)**  $\delta$  190.44 (m, 0H), 144.39, 143.47, 143.38, 142.29, 141.72, 140.63, 138.19, 135.86, 131.14, 130.13, 129.32, 128.69, 128.39, 127.79, 127.72, 127.65, 126.38, 126.08, 126.04, 125.99, 125.65, 124.82, 121.32, 109.01, 56.45, 51.5, 49.22.

**Elemental Analysis:** Calcd for C<sub>113</sub>H<sub>92</sub>ClN<sub>2</sub>Pd: C, 83.79; H, 5.72; Cl, 2.19; N, 1.73; Pd, 6.57.  
Found: C, 83.99; H, 5.72; Cl, 2.23; N, 1.73; Pd, 6.64.

### 3.4 Synthesis of [Pd(BIAN-IPr<sup>#</sup>)Cl(Allyl)] Complex (**2d**)

A 4 mL vial equipped with a magnetic stirring bar was charged with BIAN-IPr<sup>#</sup>·HCl (**1b**) (647 mg, 0.47 mmol, 2.0 equiv.) and K<sub>2</sub>CO<sub>3</sub> (130 mg, 0.97 mmol, 4.0 equiv.) in acetone (2 mL). The

mixture was stirred at room temperature for 15 min. [Pd(allyl)( $\mu$ -Cl)]<sub>2</sub> (86.4 mg, 0.235 mmol, 1.0 equiv.) was added, and stirring was continued for 1 h. The mixture was worked up as described for **2a**. The pure complex was obtained as an orange powder (97% yield)<sup>2</sup>.

**<sup>1</sup>H NMR (500 MHz, CDCl<sub>3</sub>):**  $\delta$  7.18 (m, 46H), 6.60 (m, 20H), 6.48 (s, 2H), 6.00 (d,  $J$  = 60.1 Hz, 4H), 5.65 (d,  $J$  = 6.9 Hz, 2H), 5.55 (s, 2H), 4.41 (m, 1H), 4.10 (d,  $J$  = 7.0 Hz, 1H), 2.96 (d,  $J$  = 7.7 Hz, 1H), 2.36 (s, 1H), 0.89 (d,  $J$  = 10.2 Hz, 2H).

**<sup>13</sup>C NMR (126 MHz, CDCl<sub>3</sub>)**  $\delta$  190.36, 144.46, 143.33, 141.61, 140.39, 135.84, 131.13, 130.11, 129.26, 128.34, 127.69, 126.38, 126.03, 125.96, 125.68, 124.73, 121.31, 114.59, 56.46, 53.32, 51.72.

**Elemental Analysis:** Calcd for C<sub>107</sub>H<sub>88</sub>ClN<sub>2</sub>Pd: C, 83.25; H, 5.75; Cl, 2.30; N, 1.81; Pd, 6.89. Found: C, 83.37; H, 5.95; Cl, 2.45; N, 1.94; Pd, 6.98.

#### 4. General Procedure for mechanochemical Suzuki-Miyaura Cross-Coupling of Aryl Chlorides

Aryl chloride (1.0 equiv., 0.5 mmol), aryl boronic acid (1.1 equiv., 0.55 mmol), K<sub>2</sub>CO<sub>3</sub> (1.5 equiv., 0.75 mmol), catalyst [Pd(IPr<sup>#</sup>)(cinnamyl)Cl] (**2c**) (0.125-0.062 mol%), with 10 ZrO<sub>2</sub> ball ( $\phi$  = 5mm) were placed in a 25 mL zirconia vessel containing (EtOH 0.2 $\mu$ L/mg) as liquid assisted grinding agent, ground at room temperature with 300 rpm speed for 30 minutes. The mixture was diluted with DCM (10 mL), and reaction quenched with petroleum ether. The conversion was checked by GC analysis and further purification and isolation of product done by flash chromatography on silica gel (EtOAc/petroleum ether) to afford the product<sup>10</sup>.

##### 4.1 Synthesis of 4-Methoxy-1,1'-biphenyl (3a)

Eluent: EtOAc:PE = 1:10. White solid (96% yield).

**<sup>1</sup>H NMR (400 MHz, CDCl<sub>3</sub>):**  $\delta$  7.55 (m, 4H), 7.46–7.39 (m, 2H), 7.34–7.28 (m, 1H), 7.02–6.96 (m, 2H), 3.86 (s, 3H)<sup>3</sup>.

##### 4.2 Synthesis of 4-Methyl-1,1'-biphenyl (3b)

Eluent: EtOAc:PE = 1:8. White solid (96% yield).

**<sup>1</sup>H NMR (400 MHz, CDCl<sub>3</sub>):** δ 7.60 (m, 2H), 7.51 (d, J = 8.1 Hz, 2H), 7.44 (t, J = 7.5 Hz, 2H), 7.34 (d, J = 7.3 Hz, 1H), 7.26 (m, 2H), 2.41 (s, 3H) <sup>3</sup>.

#### 4.3 Synthesis of 4-(Trifluoromethyl)-1,1'-biphenyl (3c)

Eluent: EtOAc:PE = 1:7. White solid (99% yield).

**<sup>1</sup>H NMR (400 MHz, CDCl<sub>3</sub>):** δ 7.70 (s, 4H), 7.60 (m, 2H), 7.48 (d, J = 6.3, 4.1, 1.0 Hz, 2H), 7.43 (dd, J = 5.0, 3.6 Hz, 1H) <sup>3,5</sup>.

#### 4.4 Synthesis of 3-Phenylpyridine (3d)

Reaction conducted at 50 °C. Eluent: EtOAc:PE = 1:4. White solid (91% yield).

**<sup>1</sup>H NMR (400 MHz, CDCl<sub>3</sub>):** δ 8.86 (d, J = 1.9 Hz, 1H), 8.60 (d, J = 4.8, 1.5 Hz, 1H), 7.90 (d, J = 7.9 Hz, 1H), 7.59 (m, 2H), 7.41 (m, 4H) <sup>3,6</sup>.

#### 4.5 Synthesis of 4-Methoxy-4'-methyl-1,1'-biphenyl (3e)

Eluent: EtOAc:PE = 1:7. White solid (96% yield).

**<sup>1</sup>H NMR (400 MHz, CDCl<sub>3</sub>):** δ 7.51 (d, J = 8.9 Hz, 2H), 7.45 (d, J = 8.1 Hz, 2H), 7.23 (d, J = 8.4 Hz, 2H), 6.97 (d, J = 8.9 Hz, 2H), 3.85 (s, 3H), 2.39 (s, 3H) <sup>7</sup>.

#### 4.6 Synthesis of 1,1'-Biphenyl (3f)

Eluent: EtOAc:PE = 1:9. White solid (99% yield).

**<sup>1</sup>H NMR (400 MHz, CDCl<sub>3</sub>):** δ 7.60 (d, J = 7.1 Hz, 4H), 7.45 (t, J = 7.5 Hz, 4H), 7.35 (t, J = 7.4 Hz, 2H) <sup>3</sup>.

#### 4.7 Synthesis of 4,4'-Dimethyl-1,1'-biphenyl (3g)

Eluent: EtOAc:PE = 1:6. White solid (96% yield).

**<sup>1</sup>H NMR (400 MHz, CDCl<sub>3</sub>):** δ 7.48 (d, J = 8.0 Hz, 4H), 7.25 (d, J = 7.7 Hz, 4H), 2.38 (s, 6H) <sup>4</sup>.

#### 4.8 Synthesis of 4-Methyl-4'-(trifluoromethyl)-1,1'-biphenyl (3h)

Eluent: EtOAc:PE = 1:8. White solid (91% yield).

**<sup>1</sup>H NMR (400 MHz, CDCl<sub>3</sub>):** δ 7.67 (s, 2H), 7.49 (d, J = 8.3 Hz, 2H), 7.27 (d, J = 8.5 Hz, 4H), 2.41 (s, 3H) <sup>8</sup>.

#### 4.9 Synthesis of 4-Fluoro-4'-methoxy-1,1'-biphenyl (3i)

Eluent: EtOAc:PE = 1:10. White solid (91% yield).

<sup>1</sup>H NMR (400 MHz, CDCl<sub>3</sub>): δ 7.48 (s, 4H), 7.10 (t, J = 8.7 Hz, 2H), 6.98 (d, J = 8.8 Hz, 2H), 3.85 (s, 3H) <sup>9</sup>.

#### 4.10 Synthesis of 4-Fluoro-4'-methyl-1,1'-biphenyl (3j)

Eluent: EtOAc:PE = 1:20. White solid (91% yield).

<sup>1</sup>H NMR (400 MHz, CDCl<sub>3</sub>): δ 7.55 (m, 4H), 7.22–7.06 (m, 4H), 2.39 (s, 3H) <sup>9</sup>.

#### 4.11 Synthesis of 4,4'-Dimethoxy-1,1'-biphenyl (3k)

Eluent: EtOAc:PE = 1:9. White solid (91% yield).

<sup>1</sup>H NMR (400 MHz, CDCl<sub>3</sub>): <sup>1</sup>H NMR (400 MHz, CDCl<sub>3</sub>) δ 7.48 – 7.07 (m, 4H), 7.04 – 6.73 (m, 4H), 3.77 (s, 6H) <sup>9</sup>.

#### 4.12 Synthesis of [1,1'-Biphenyl]-4-carbaldehyde (3l)

Eluent: EtOAc:PE = 1:12. White solid (91% yield).

<sup>1</sup>H NMR (400 MHz, CDCl<sub>3</sub>): δ 10.07 (s, 1H), 7.96 (d, J = 8.4 Hz, 2H), 7.76 (d, J = 8.3 Hz, 2H), 7.64 (m, 2H), 7.49 (m, 2H), 7.43 (m, 1H) <sup>3</sup>.

#### 4.13 Synthesis of 1-([1,1'-Biphenyl]-4-yl)ethanone (3m)

Eluent: EtOAc:PE = 1:12. White solid (92% yield).

<sup>1</sup>H NMR (400 MHz, CDCl<sub>3</sub>): δ 8.04 (d, J = 8.6 Hz, 2H), 7.69 (m, 2H), 7.63 (m, 2H), 7.48 (m, 2H), 7.42 (m, 1H), 2.64 (s, 3H) <sup>3</sup>.

#### 4.14 Synthesis of 4-(Naphthalen-2-yl)benzaldehyde (3n)

Eluent: EtOAc:PE = 1:7. White solid (89% yield).

<sup>1</sup>H NMR (400 MHz, CDCl<sub>3</sub>): δ 10.09 (s, 1H), 8.11 (s, 1H), 7.97–7.89 (m, 7H), 7.55 (d, J = 8.3 Hz, 1H), 7.26 (d, J = 8.4 Hz, 2H).

#### 4.15 Synthesis of 1-(4-(Naphthalen-2-yl)phenyl)ethanone (3o)

Eluent: EtOAc:PE = 1:8. White solid (91% yield).

<sup>1</sup>H NMR (400 MHz, CDCl<sub>3</sub>): δ 8.06 (m, 3H), 7.95 (m, 6H), 7.46 (m, 2H), 2.69 (s, 3H).

#### 4.16 Synthesis of 3-(Naphthalen-2-yl)pyridine (3p)

Reaction conducted at 50 °C. Eluent: EtOAc:PE = 1:6. White solid (89% yield).

<sup>1</sup>H NMR (400 MHz, CDCl<sub>3</sub>): δ 8.99 (d, *J* = 1.8 Hz, 1H), 8.63 (dd, *J* = 4.7, 1.3 Hz, 1H), 8.05 (d, *J* = 1.3 Hz, 1H), 8.02 – 7.99 (m, 1H), 7.96 (d, *J* = 8.5 Hz, 1H), 7.93 – 7.88 (m, 2H), 7.73 – 7.70 (m, 1H), 7.55 – 7.51 (m, 2H), 7.43 – 7.40 (m, 1H).

#### 4.17 Synthesis of 4-(7-Methoxynaphthalen-2-yl)benzaldehyde (3q)

Eluent: EtOAc:PE = 1:8. White solid (86% yield).

<sup>1</sup>H NMR (400 MHz, CDCl<sub>3</sub>): δ 10.04 (s, 1H), 7.92 (d, *J* = 7.4 Hz, 2H), 7.21 (d, *J* = 8.3 Hz, 2H), 6.93 (m, 4H), 3.86 (s, 3H).

#### 4.18 Synthesis of 3-Methoxy-4'-(trifluoromethyl)-1,1'-biphenyl (3r)

Eluent: EtOAc:PE = 1:7. White solid (93% yield).

<sup>1</sup>H NMR (400 MHz, CDCl<sub>3</sub>): δ 7.73 (m, 4H), 7.24 (d, *J* = 8.1 Hz, 1H), 7.19 (m, 2H), 7.01 (d, *J* = 7.7 Hz, 1H), 3.86 (s, 3H).

#### 4.19 Synthesis of 1-(p-Tolyl)naphthalene (3s)

Eluent: EtOAc:PE = 1:10. White solid (91% yield).

<sup>1</sup>H NMR (400 MHz, CDCl<sub>3</sub>): δ 7.88–7.54 (m, 7H), 7.44 (d, *J* = 8.4, 9.3 Hz, 4H), 2.40 (s, 3H).

### 5. General Procedure for mechanochemical Buchwald-Hartwig Amination Reaction

A 25 mL zirconia vessel was charged with the catalyst [Pd(NHC)Cl(Cinnamyl)] (0.125 mol%), aryl chloride (0.50 mmol), amine (0.55 mmol), K<sup>t</sup>BuO (0.75 mmol), (EtOH 0.2 μL/mg) as liquid assisted grinding agent, with 10 ZrO<sub>2</sub> ball (ø = 5mm) ground at room temperature with 300 rpm speed for 40-60minutes. The mixture was diluted with DCM (10 mL), and reaction quenched with diethylether. The conversion was checked by GC analysis and further purification and isolation of product done by flash chromatography on silica gel (EtOAc/petroleum ether) to afford the product<sup>11,12</sup>.

#### 5.1 Synthesis of 4-(4-Methoxyphenyl)morpholine (4a)

Eluent: EtOAc:PE = 1:5. White solid (99% yield).

**<sup>1</sup>H NMR (400 MHz, CDCl<sub>3</sub>):** <sup>1</sup>H NMR (400 MHz, CDCl<sub>3</sub>) δ 6.91 – 6.83 (m, 4H), 3.88 – 3.84 (m, 4H), 3.77 (s, 3H), 3.07 – 3.04 (m, 4H).<sup>3</sup>

### 5.2 Synthesis of 4-Methoxy-N-phenylaniline (4b)

Eluent: EtOAc:PE = 1:7. White solid (90% yield).

**<sup>1</sup>H NMR (400 MHz, CDCl<sub>3</sub>):** δ 7.19 (m, 2H), 7.06 (m, 2H), 6.92–6.78 (m, 5H), 5.47 (s, 1H), 3.78 (s, 3H)<sup>3</sup>.

### 5.3 Synthesis of 4-(4-(Trifluoromethyl)phenyl)morpholine (4c)

Eluent: EtOAc:PE = 1:20. White solid (84% yield).

**<sup>1</sup>H NMR (400 MHz, CDCl<sub>3</sub>):** δ 7.50 (d, J = 8.7 Hz, 2H), 6.92 (d, J = 8.7 Hz, 2H), 3.95–3.81 (m, 4H), 3.29–3.15 (m, 4H)<sup>3</sup>.

### 5.4 Synthesis of N-Phenyl-4-(trifluoromethyl)aniline (4d)

Eluent: EtOAc:PE = 1:20. White solid (84% yield).

**<sup>1</sup>H NMR (400 MHz, CDCl<sub>3</sub>)** δ 7.14 (m, 4H), 6.73 (m, 5H), 3.24 (s, 1H).

### 5.5 Synthesis of 4-(p-Tolyl)morpholine (4e)

Eluent: EtOAc:PE = 1:20. White solid (84% yield).

**<sup>1</sup>H NMR (400 MHz, CDCl<sub>3</sub>):** δ 7.09 (d, J = 8.5 Hz, 2H), 6.83 (d, J = 5.6 Hz, 2H), 4.10–3.66 (m, 4H), 3.31–2.92 (m, 4H), 2.27 (s, 3H)<sup>3</sup>.

### 5.6 Synthesis of 4-Methoxy-N-methyl-N-phenylaniline (4f)

Eluent: EtOAc:PE = 1:20. White solid (84% yield).

**<sup>1</sup>H NMR (400 MHz, CDCl<sub>3</sub>)** δ 7.17 (m, 2H), 7.06 (t, J = 13.5 Hz, 2H), 6.85 (m, 5H), 3.80 (s, 3H), 3.28 (m, 3H)<sup>3</sup>.

### 5.7 Synthesis of N-Methyl-N-phenylpyridin-3-amine (4g)

Eluent: EtOAc:PE = 1:20. White solid (84% yield).

**<sup>1</sup>H NMR (400 MHz, CDCl<sub>3</sub>):** δ 8.30 (d, J = 2.8 Hz, 1H), 8.11 (d, J = 4.6 Hz, 1H), 7.43–7.25 (m, 2H), 7.21–7.01 (m, 5H), 3.35–3.26 (m, 3H)<sup>3</sup>.

### 5.8 Synthesis of Bis(4-methoxyphenyl)amine (4h)

Eluent: EtOAc:PE = 1:20. White solid (84% yield).

$^1\text{H NMR}$  (400 MHz,  $\text{CDCl}_3$ )  $\delta$  6.84 (m, 8H), 3.69 (s, 6H), 1.58 (s, 1H) .

### 5.9 Synthesis of 3-Methoxy-N-phenylaniline (4i)

Eluent: EtOAc:PE = 1:20. White solid (84% yield).

$^1\text{H NMR}$  (400 MHz,  $\text{CDCl}_3$ ):  $\delta$  7.09–6.95 (m, 5H), 6.86–6.82 (m, 4H), 5.39 (s, 1H), 3.78 (s, 3H)  
3.

### 5.10 Synthesis of 2,6-Diethyl-N-phenylaniline (4j)

Eluent: EtOAc:PE = 1:20. White solid (84% yield).

$^1\text{H NMR}$  (400 MHz,  $\text{CDCl}_3$ ):  $\delta$  7.03 (m, 5H), 6.40 (m, 3H), 5.06 (s, 1H), 2.57 (dd,  $J = 6.4, 1.1$  Hz, 4H), 2.22 (s, 6H).

### 5.11 Synthesis of 2,4,6-Trimethyl-N-(p-tolyl)aniline (4k)

Eluent: EtOAc:PE = 1:20. White solid (84% yield).

$^1\text{H NMR}$  (400 MHz,  $\text{CDCl}_3$ ):  $^1\text{H NMR}$  (400 MHz,  $\text{CDCl}_3$ )  $\delta$  6.94 (dd,  $J = 10.7, 2.8$  Hz, 4H), 6.42 – 6.38 (m, 2H), 5.23 (s, 1H), 2.29 (s, 3H), 2.22 (s, 3H), 2.15 (s, 6H).

### 5.12 Synthesis of N-(4-Methoxyphenyl)-2,4,6-trimethylaniline (4l)

Eluent: EtOAc:PE = 1:20. White solid (84% yield).

$^1\text{H NMR}$  (400 MHz,  $\text{CDCl}_3$ ):  $^1\text{H NMR}$  (400 MHz,  $\text{CDCl}_3$ )  $\delta$  6.92 (s, 2H), 6.75 – 6.71 (m, 2H), 6.49 (dd,  $J = 26.0, 5.7$  Hz, 2H), 5.29 (s, 1H), 3.73 (s, 3H), 2.29 (s, 3H), 2.15 (s, 6H).

### 5.13 Synthesis of N-Cyclohexyl-4-methoxyaniline (4m)

Eluent: EtOAc:PE = 1:20. White solid (84% yield).

$^1\text{H NMR}$  (400 MHz,  $\text{CDCl}_3$ ):  $\delta$   $^1\text{H NMR}$  (400 MHz,  $\text{CDCl}_3$ )  $\delta$  6.78 – 6.74 (m, 2H), 6.60 – 6.56 (m, 2H), 3.74 (s, 3H), 2.92 (s, 1H), 2.06 – 2.01 (m, 2H), 1.78 – 1.72 (m, 2H), 1.66 – 1.61 (m, 1H), 1.46 – 1.3 (m, 2H), 1.29-1.5 (m, 2H), 1.5-0.98(m, 2H).

### 5.14 Synthesis of N-Cyclohexylpyridin-3-amine (4n)

Eluent: EtOAc:PE = 1:20. White solid (84% yield).

$^1\text{H NMR}$  (400 MHz,  $\text{CDCl}_3$ )  $\delta$  7.99 (d,  $J = 2.8$  Hz, 1H), 7.90 (d,  $J = 4.6$  Hz, 1H), 7.05 (dd,  $J =$

8.3, 4.6 Hz, 1H), 6.87 – 6.83 (m, 1H), 3.61 (s, 1H), 2.06 – 2.02 (m, 2H), 1.81 – 1.74 (m, 2H), 1.69 – 1.63 (m, 1H), 1.44 – 1.10 (m, 6H).

## 6. Reference

1. (a) Tu, T., Sun, Z., Fang, W., Xu, M., & Zhou, Y. (2012). Robust acenaphthoimidazolylidene palladium complexes: highly efficient catalysts for suzuki–miyaura couplings with sterically hindered substrates. *Organic letters*, *14*(16), 4250-4253.(b) Zhao, Q.; Meng, G.; Li, G.; Flach, C.; Mendelsohn, R.; Lalancette, R.; Szostak, R.; Szostak, M., IPr#–highly hindered, broadly applicable N-heterocyclic carbenes. *Chemical Science* **2021**, *12* (31), 10583-10589.
2. Chen, A.; Liao, D.; Chen, C., Promoting Ethylene (co) Polymerization in Aliphatic Hydrocarbon Solvents Using tert-Butyl Substituted Nickel Catalysts. *Chinese Journal of Chemistry* **2022**, *40* (2), 215-222.
3. Liu, Y.; Voloshkin, V. A.; Scattolin, T.; Peng, M.; Van Hecke, K.; Nolan, S. P.; Cazin, C. S., Versatile and Highly Efficient trans-[Pd (NHC) Cl<sub>2</sub> (DMS/THT)] Precatalysts for C– N and C– C Coupling Reactions in Green Solvents. *European Journal of Organic Chemistry* **2022**, *2022* (14), e202200309.
4. Chartoire, A.; Lesieur, M.; Falivene, L.; Slawin, A. M.; Cavallo, L.; Cazin, C. S.; Nolan, S. P., [Pd (IPr\*)(cinnamyl) Cl]: An Efficient Pre-catalyst for the Preparation of Tetra-ortho-substituted Biaryls by Suzuki–Miyaura Cross-Coupling. *Chemistry–A European Journal* **2012**, *18* (15), 4517-4521.
5. Rehman, M. A. U.; Adeel, M.; Alshehri, S. M.; Aiman, U.; Villinger, A.; Bullo, S.; Baby, R.; Asghar, M. A.; Kuznetsov, A. E.; Sanyang, M. L., Novel Fluorinated Biphenyl Compounds Synthesized via Pd (0)-Catalyzed Reactions: Experimental and Computational Studies. *ACS omega* **2023**, *8* (32), 29414-29423.
6. Campeau, L.-C.; Rousseaux, S.; Fagnou, K., A solution to the 2-pyridyl organometallic cross-coupling problem: Regioselective catalytic direct arylation of pyridine N-oxides. *Journal of the American Chemical Society* **2005**, *127* (51), 18020-18021.
7. Ali, H. A.; Ismail, M. A.; Fouda, A. E.-A. S.; Ghaith, E. A., A fruitful century for the scalable synthesis and reactions of biphenyl derivatives: applications and biological aspects. *RSC advances* **2023**, *13* (27), 18262-18305.

8. Tyagi, D.; Binnani, C.; Rai, R. K.; Dwivedi, A. D.; Gupta, K.; Li, P.-Z.; Zhao, Y.; Singh, S. K., Ruthenium-catalyzed oxidative homocoupling of arylboronic acids in water: Ligand tuned reactivity and mechanistic study. *Inorganic Chemistry* **2016**, *55* (12), 6332-6343.
9. Bhakuni, B. S.; Yadav, A.; Kumar, S.; Kumar, S., AMVN-initiated expedient synthesis of biaryls by the coupling reaction of unactivated arenes and heteroarenes with aryl iodides. *New Journal of Chemistry* **2014**, *38* (2), 827-836.
10. Klingensmith, L. M.; & Leadbeater, N. E.. Ligand-free palladium catalysis of aryl coupling reactions facilitated by grinding. *Tetrahedron letters*, **2003** *44*(4), 765-768.
11. Shao, Q. L.; Jiang, Z. J.; & Su, W. K. Solvent-free mechanochemical Buchwald-Hartwig amination of aryl chlorides without inert gas protection. *Tetrahedron Letters* **2018**.*59*(23), 2277-2280.
12. Cao, Q.; Nicholson, W. I.; Jones, A. C.; & Browne, D. L.. Robust Buchwald–Hartwig amination enabled by ball-milling. *Organic & Biomolecular Chemistry* **2019** *17*(7), 1722-1726.

## NMR Spectra

1a

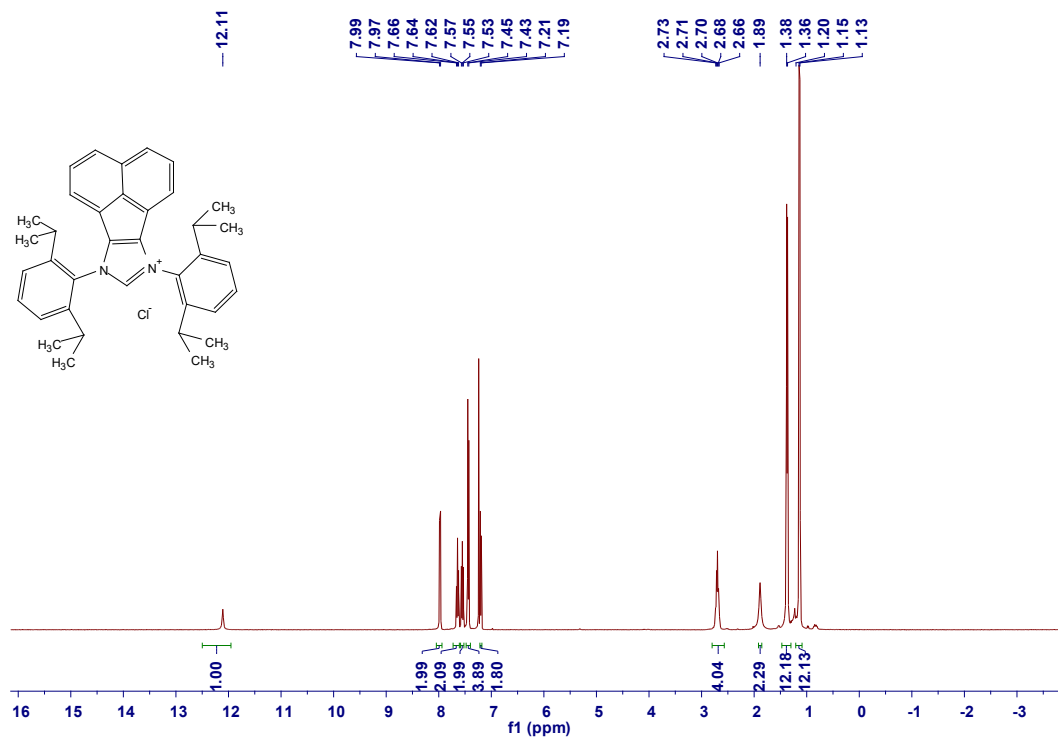

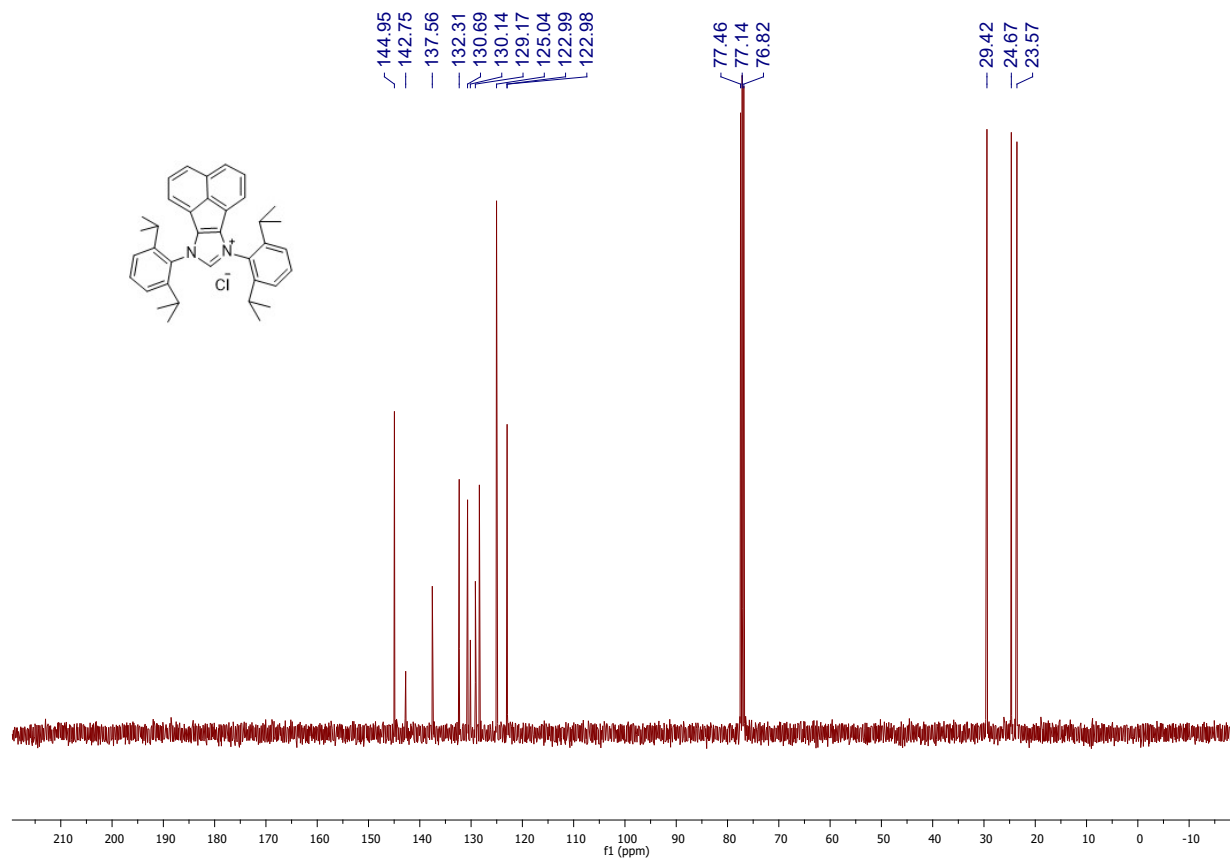

**1b**

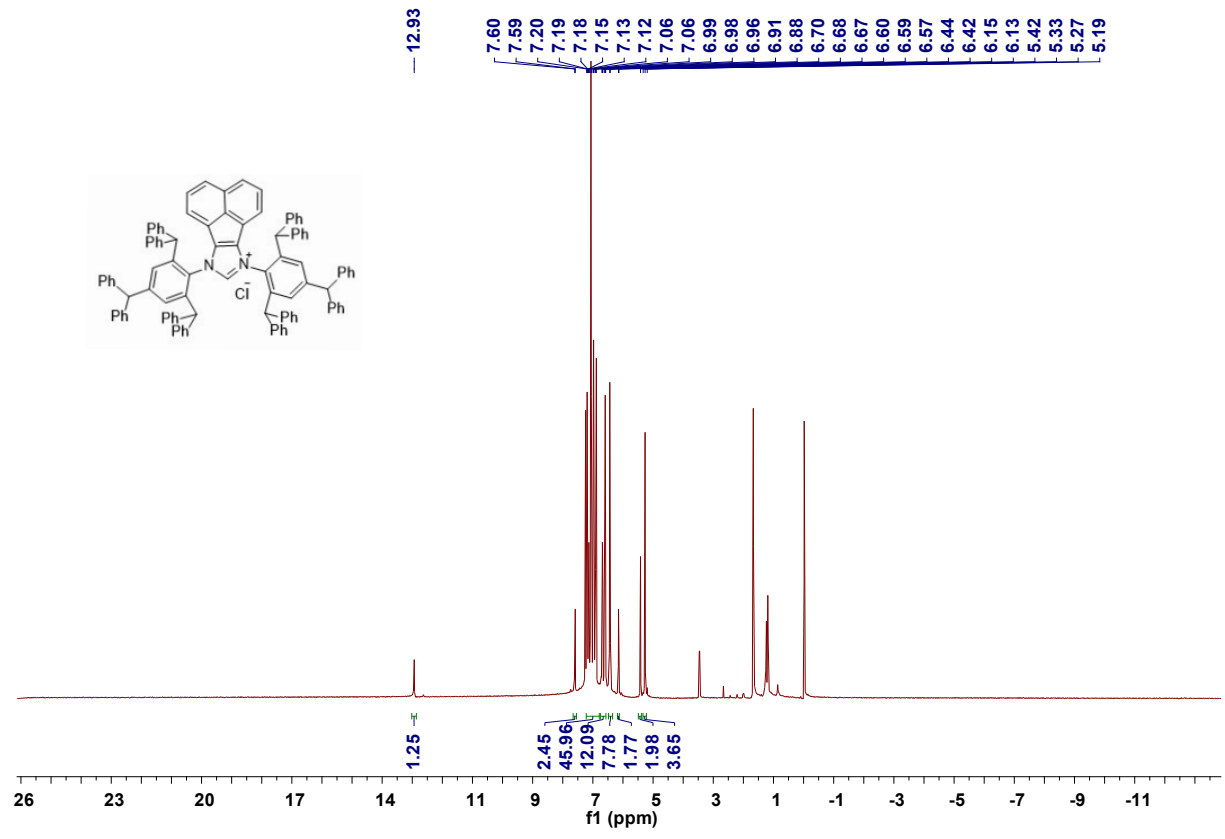



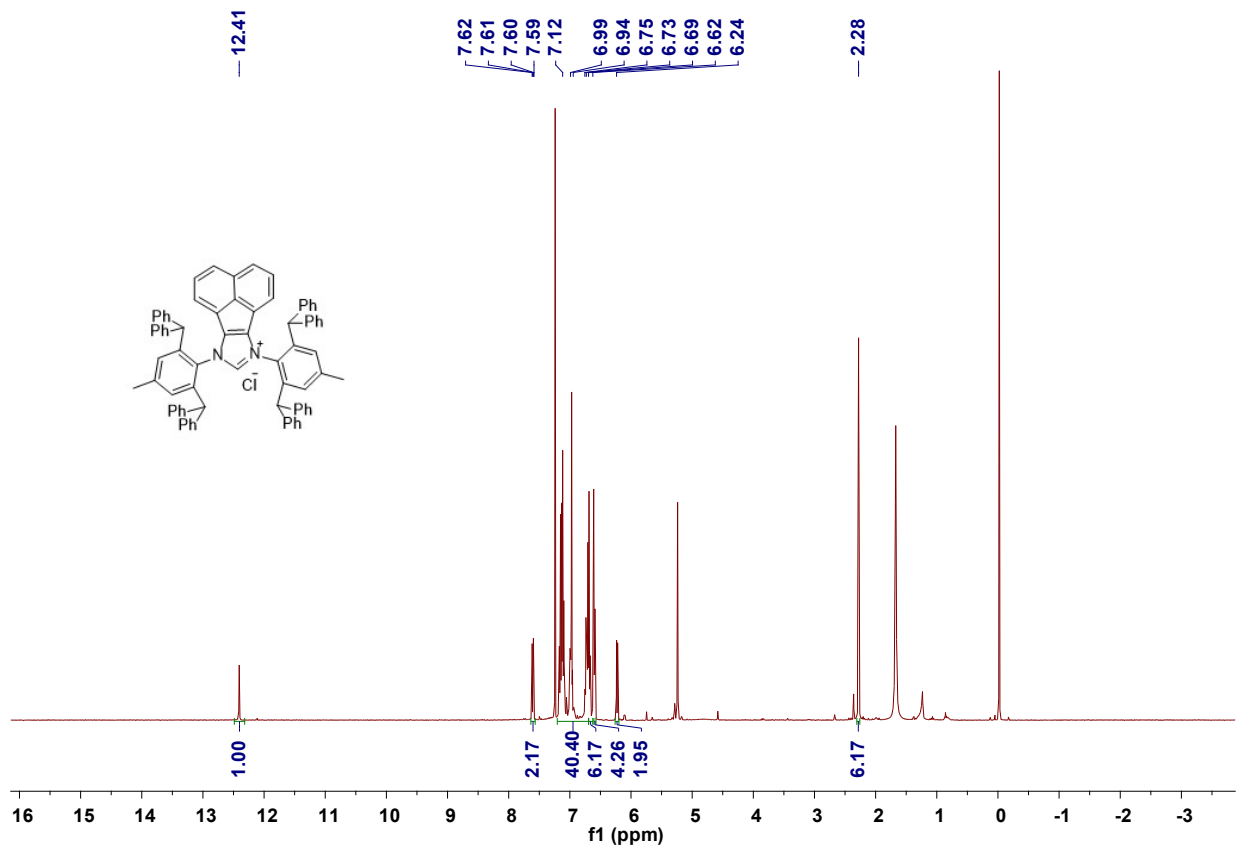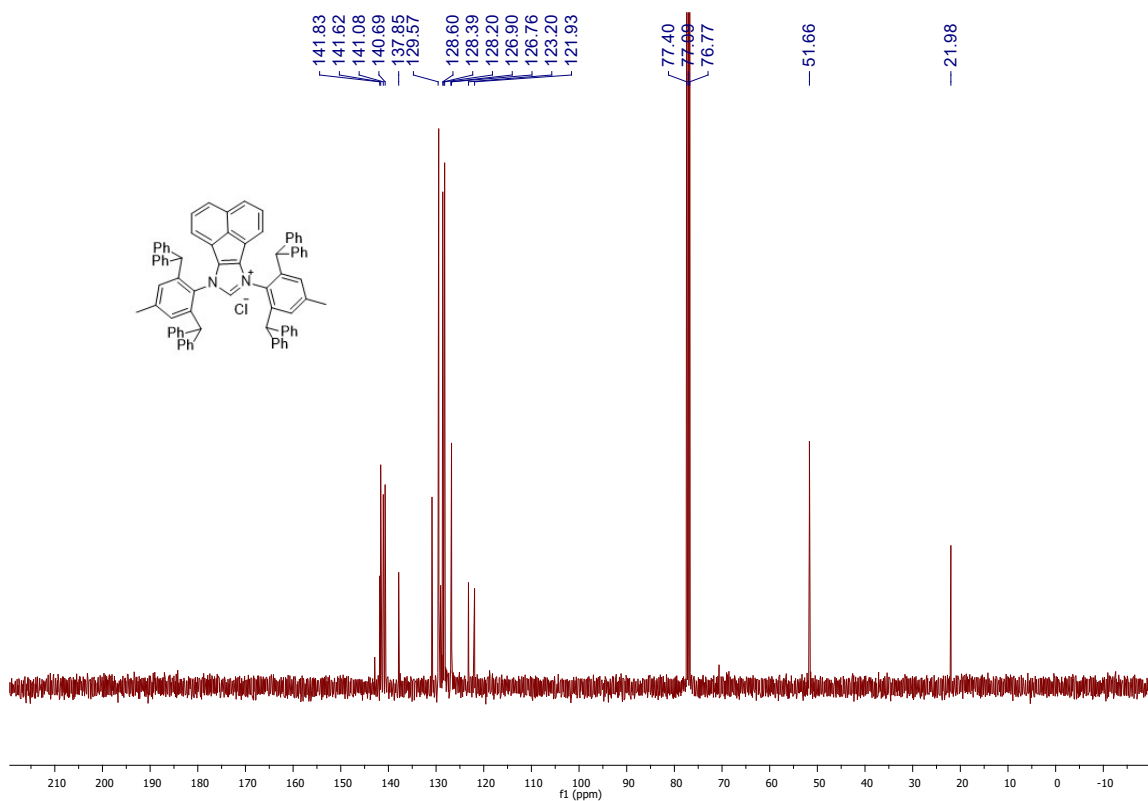

2a

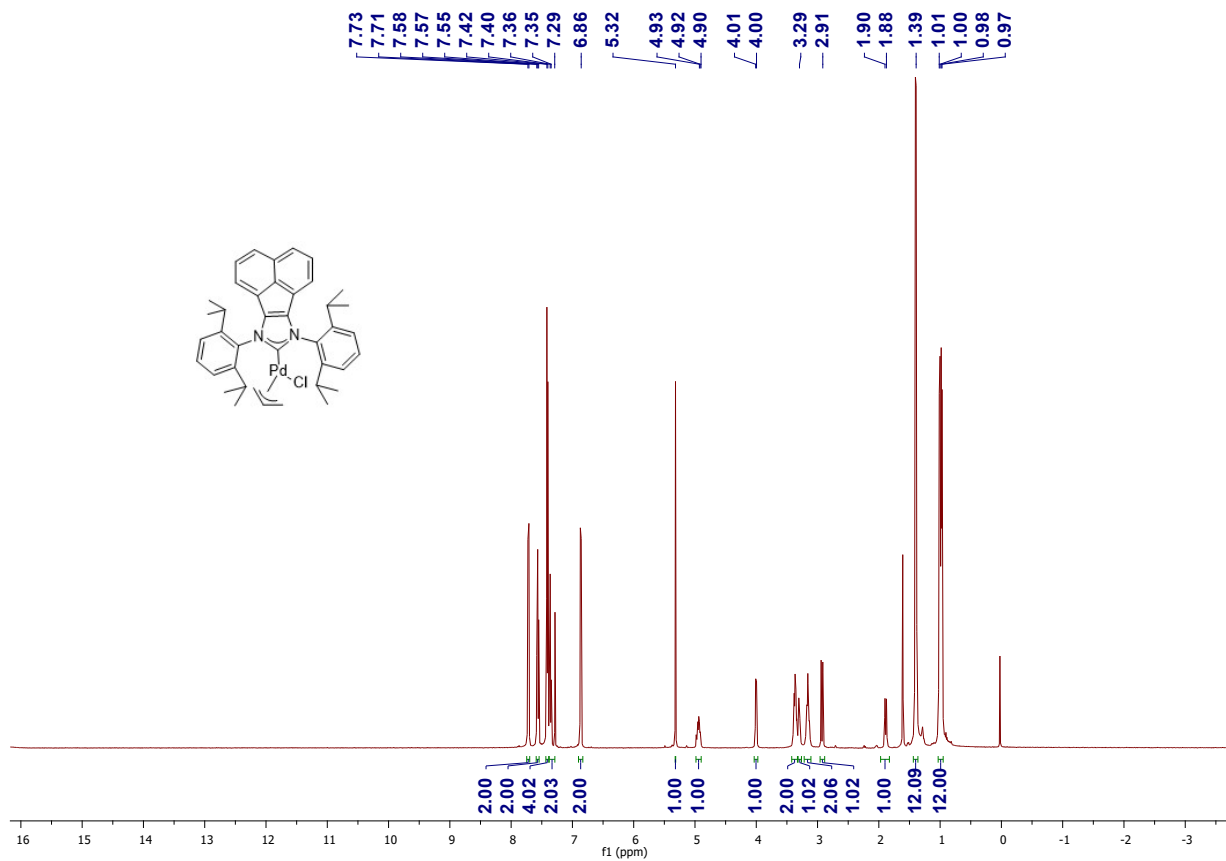

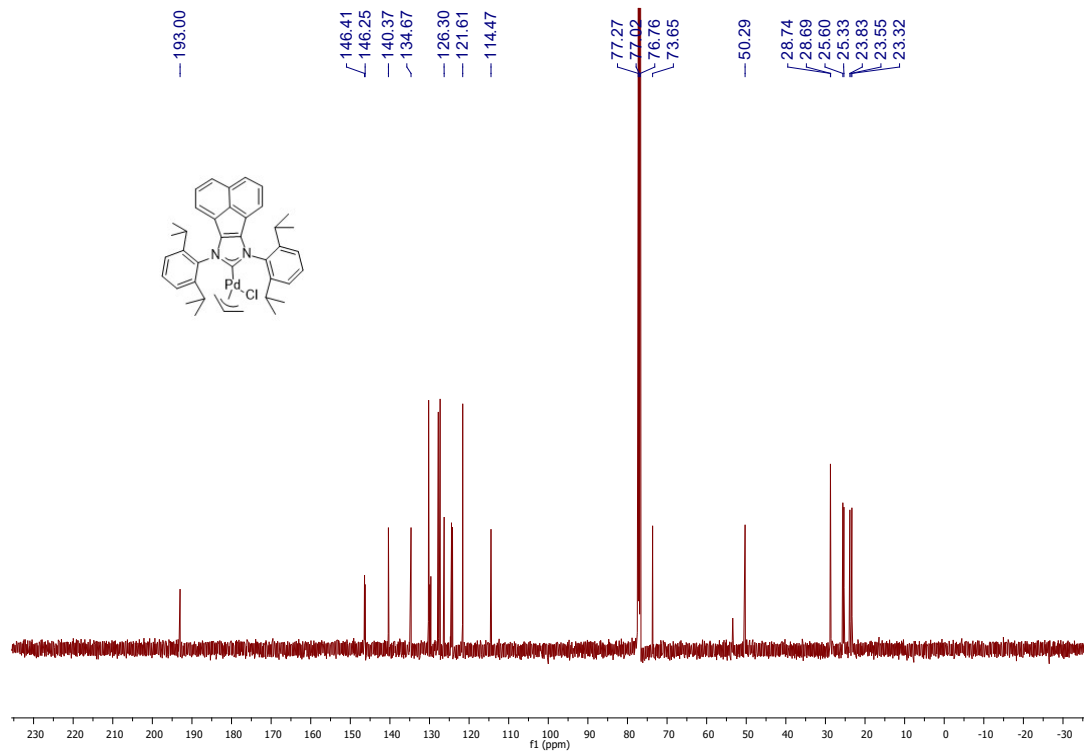

2b

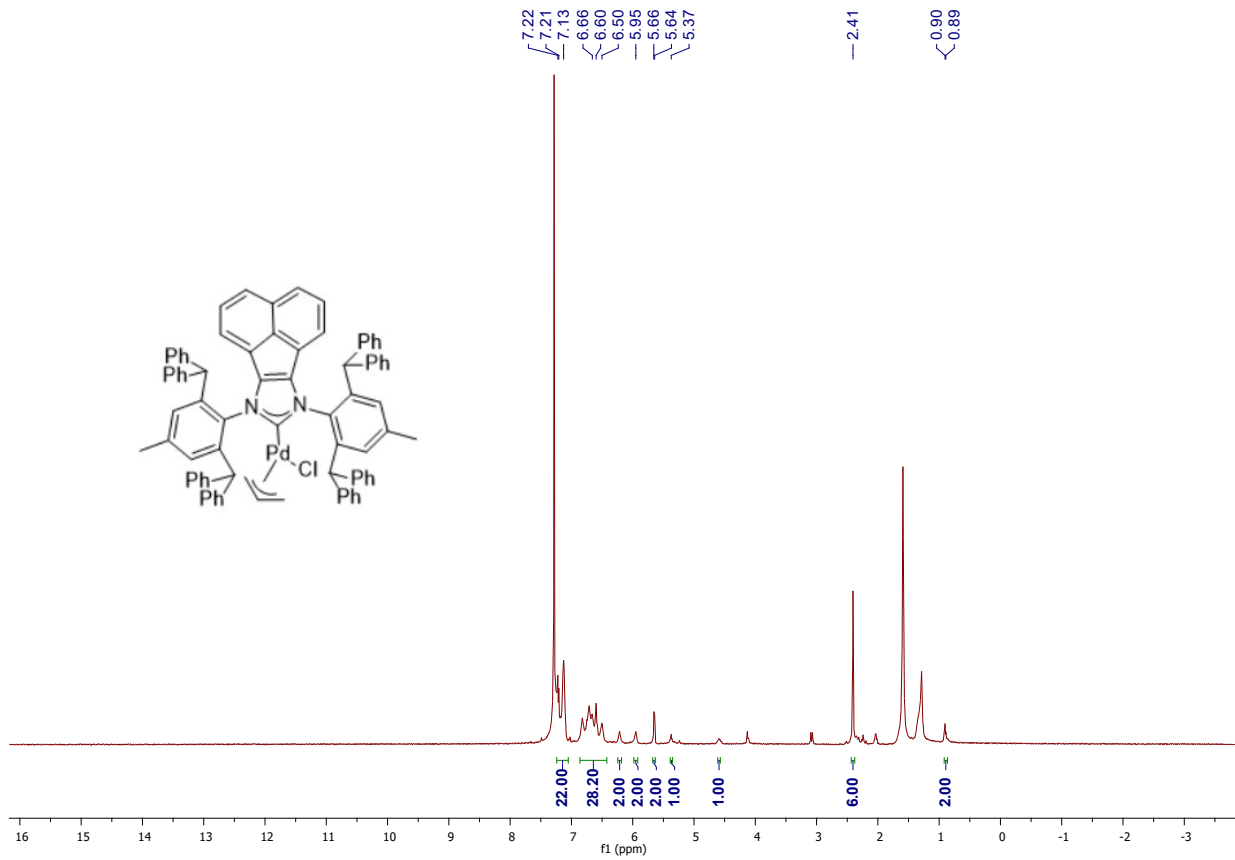

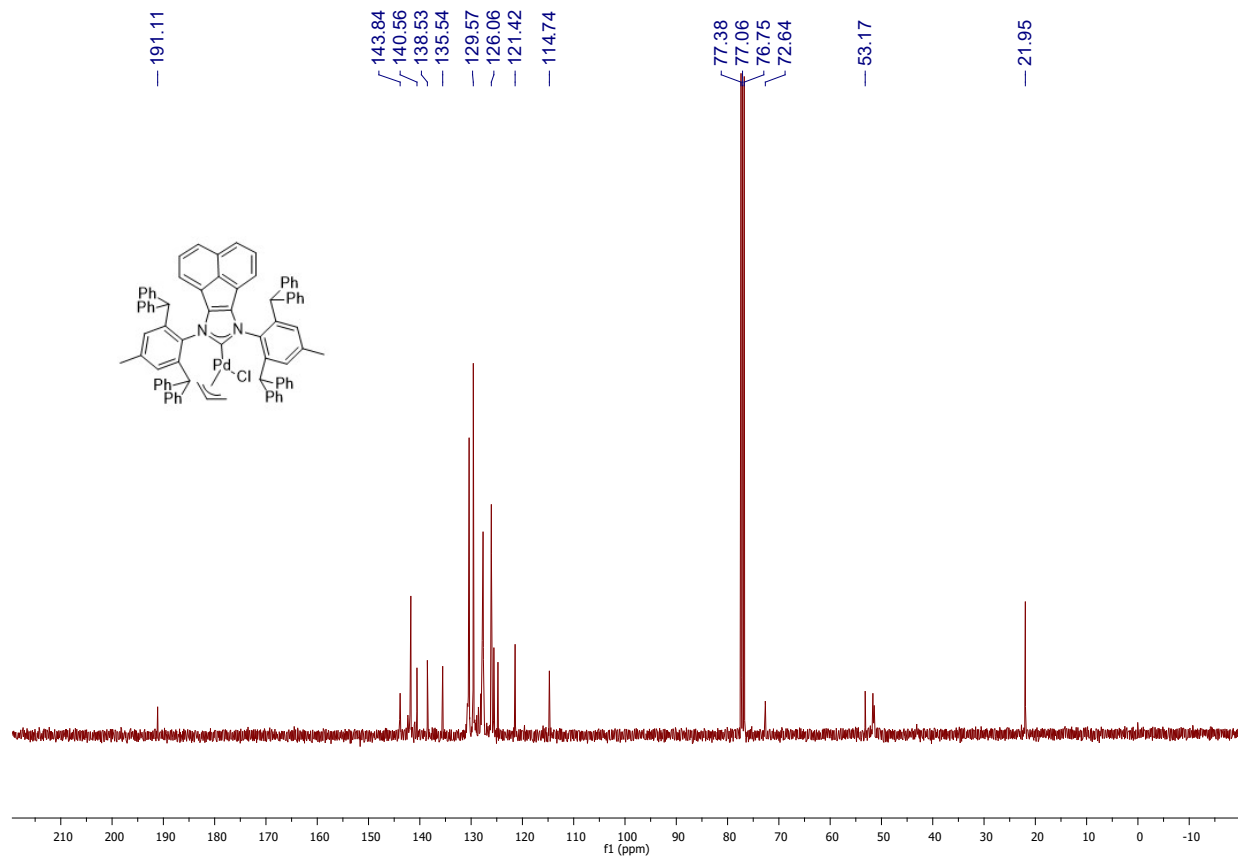

2c

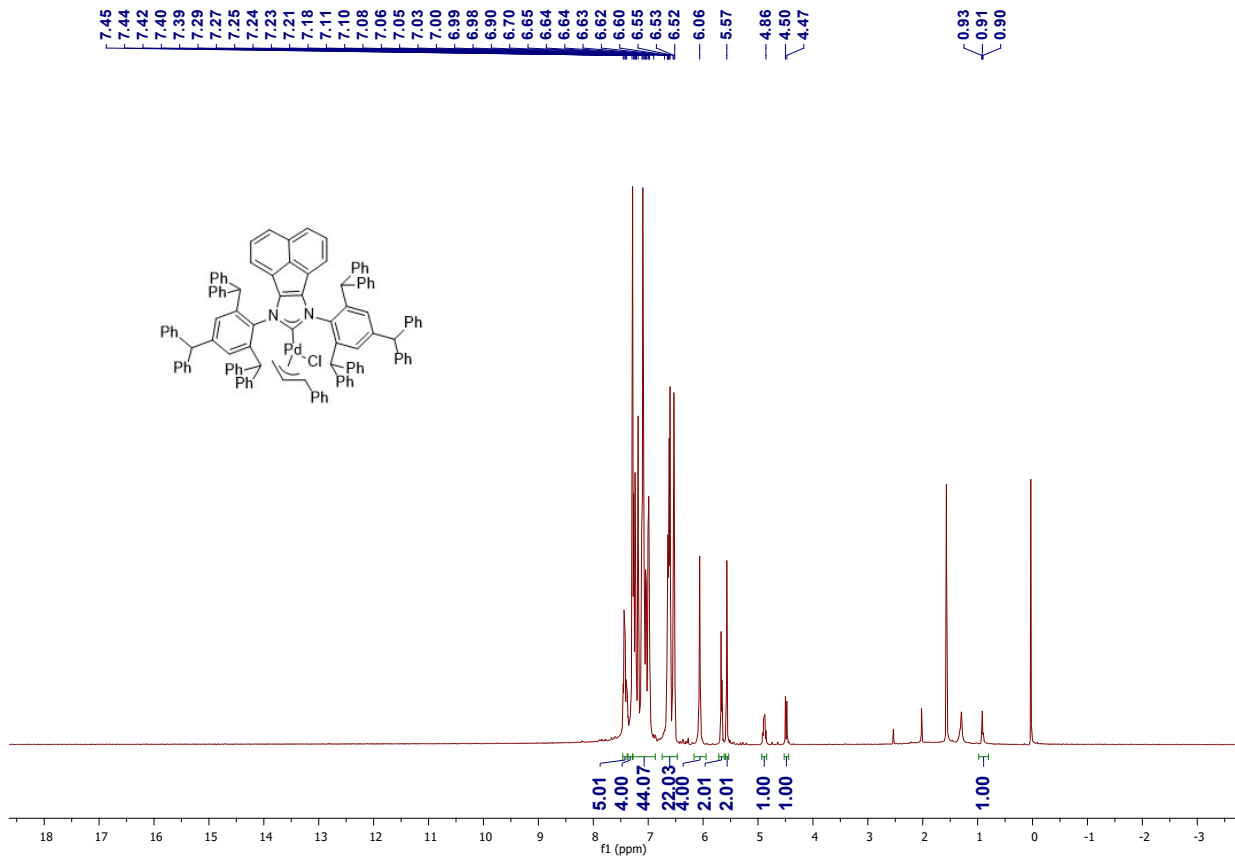

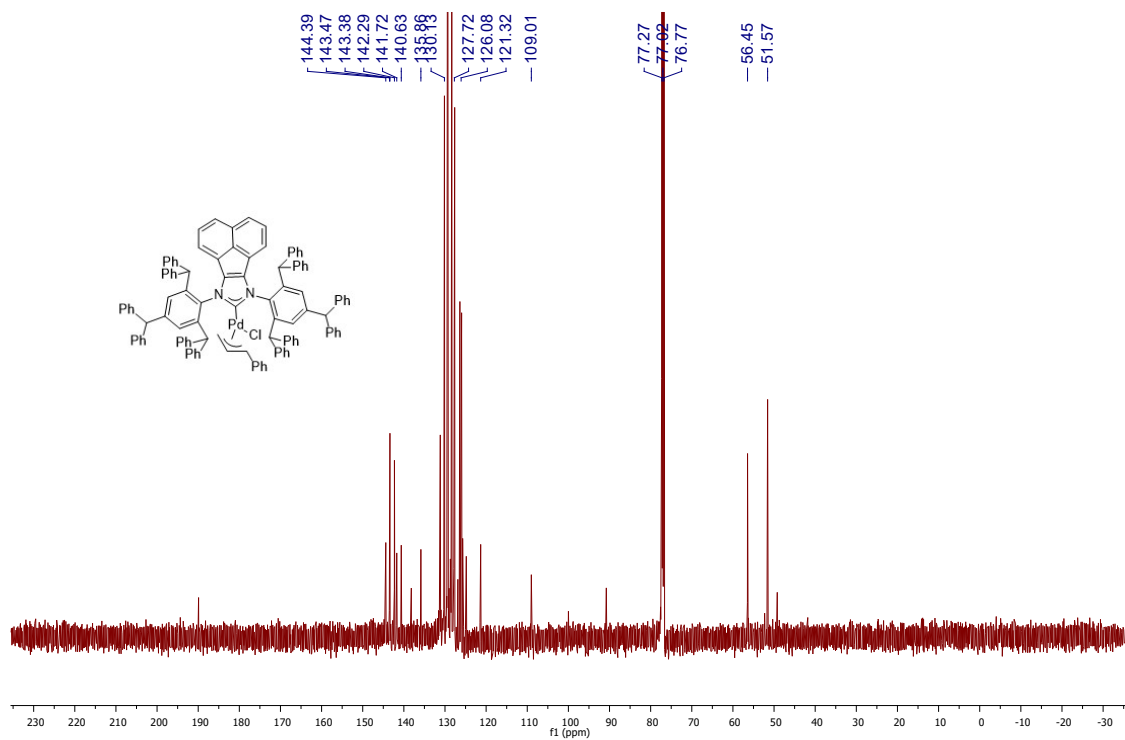

2d

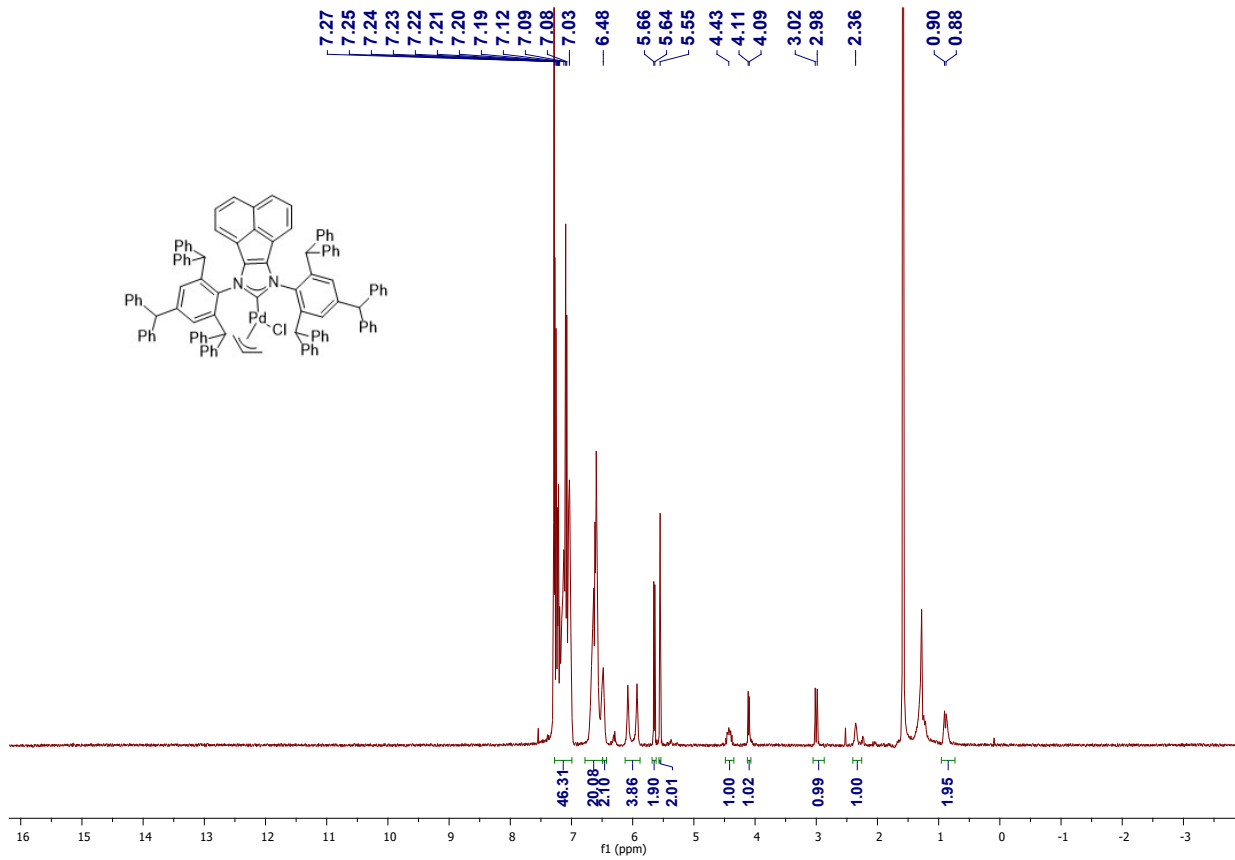

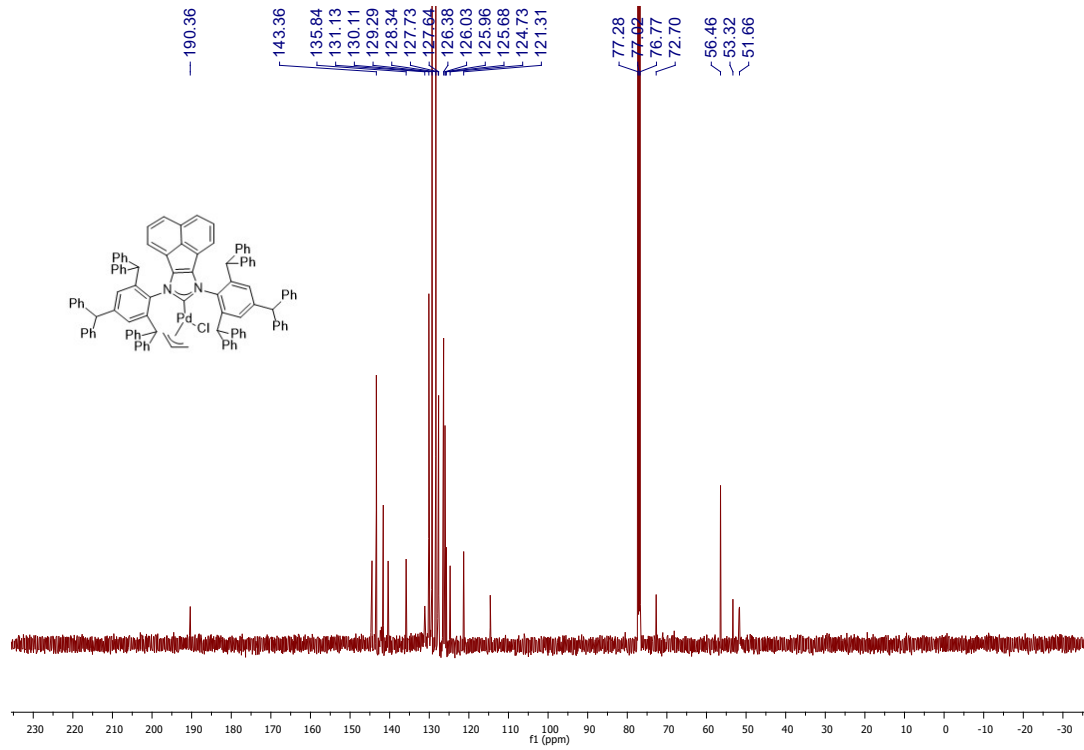

3a

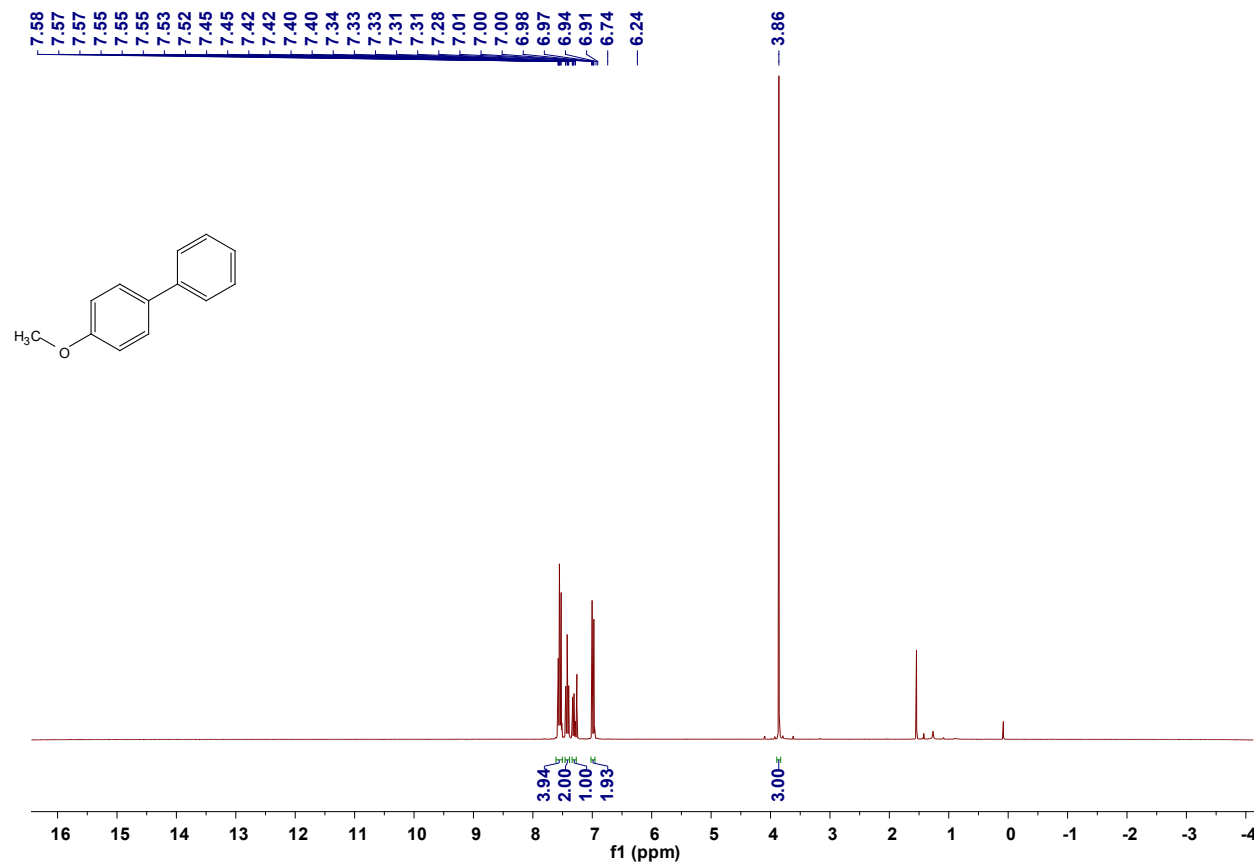

3b

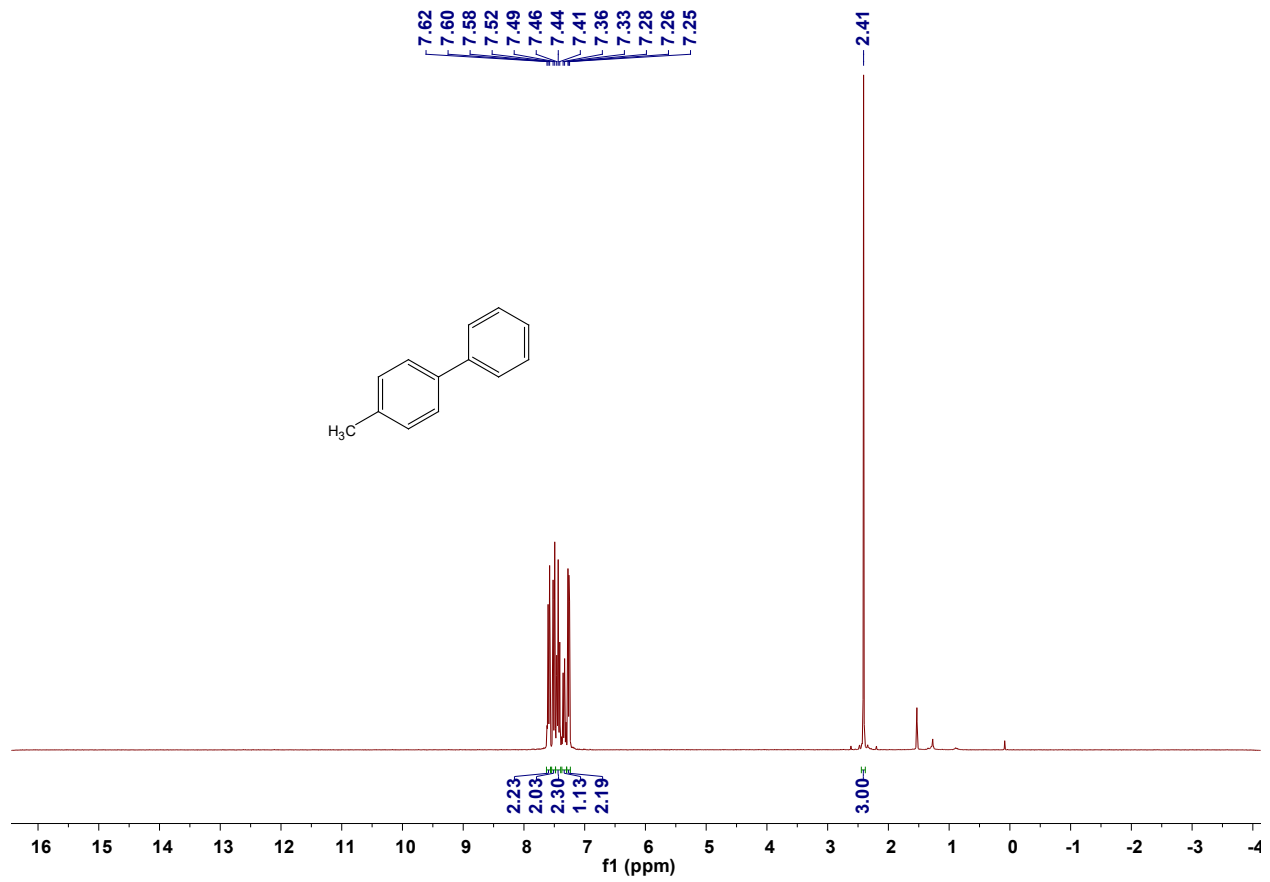

3c

7.62  
7.62  
7.60  
7.59  
7.59  
7.51  
7.50  
7.49  
7.48  
7.48  
7.46  
7.46  
7.45  
7.44  
7.43  
7.43  
7.41

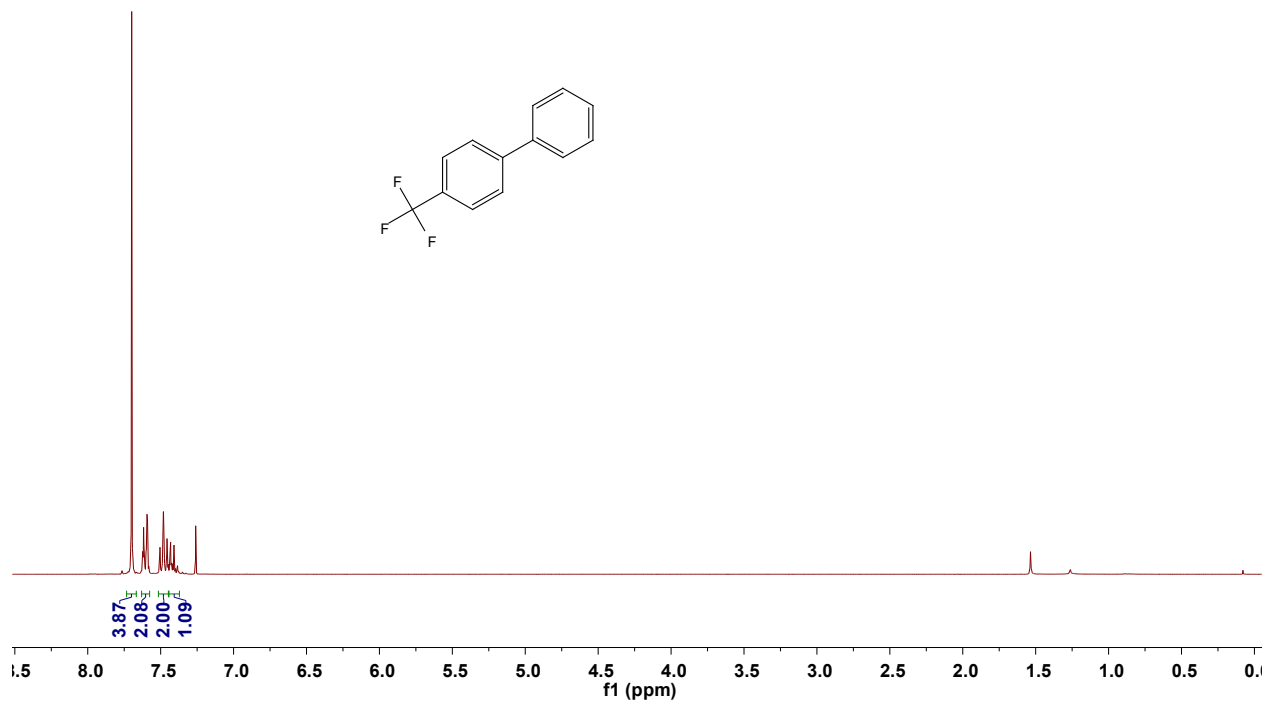

3d

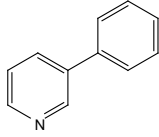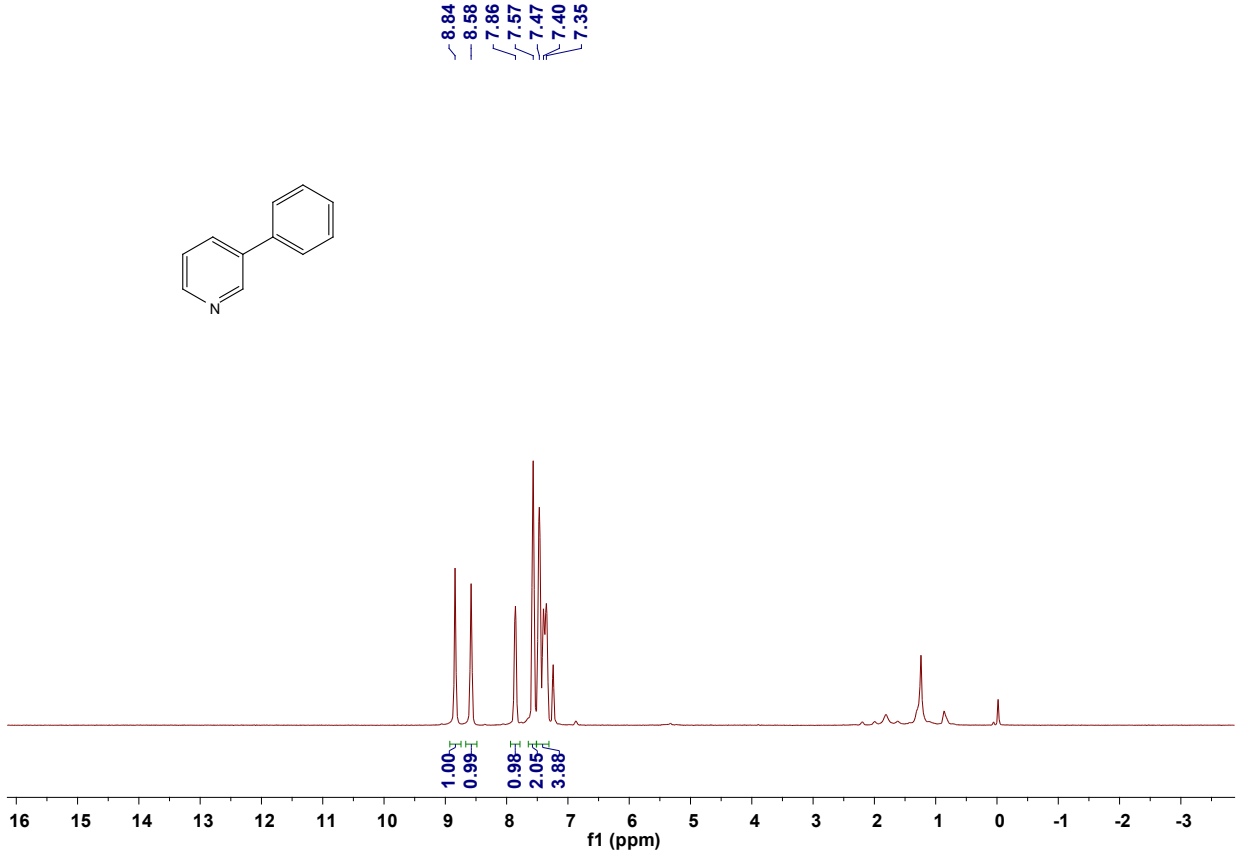

3e

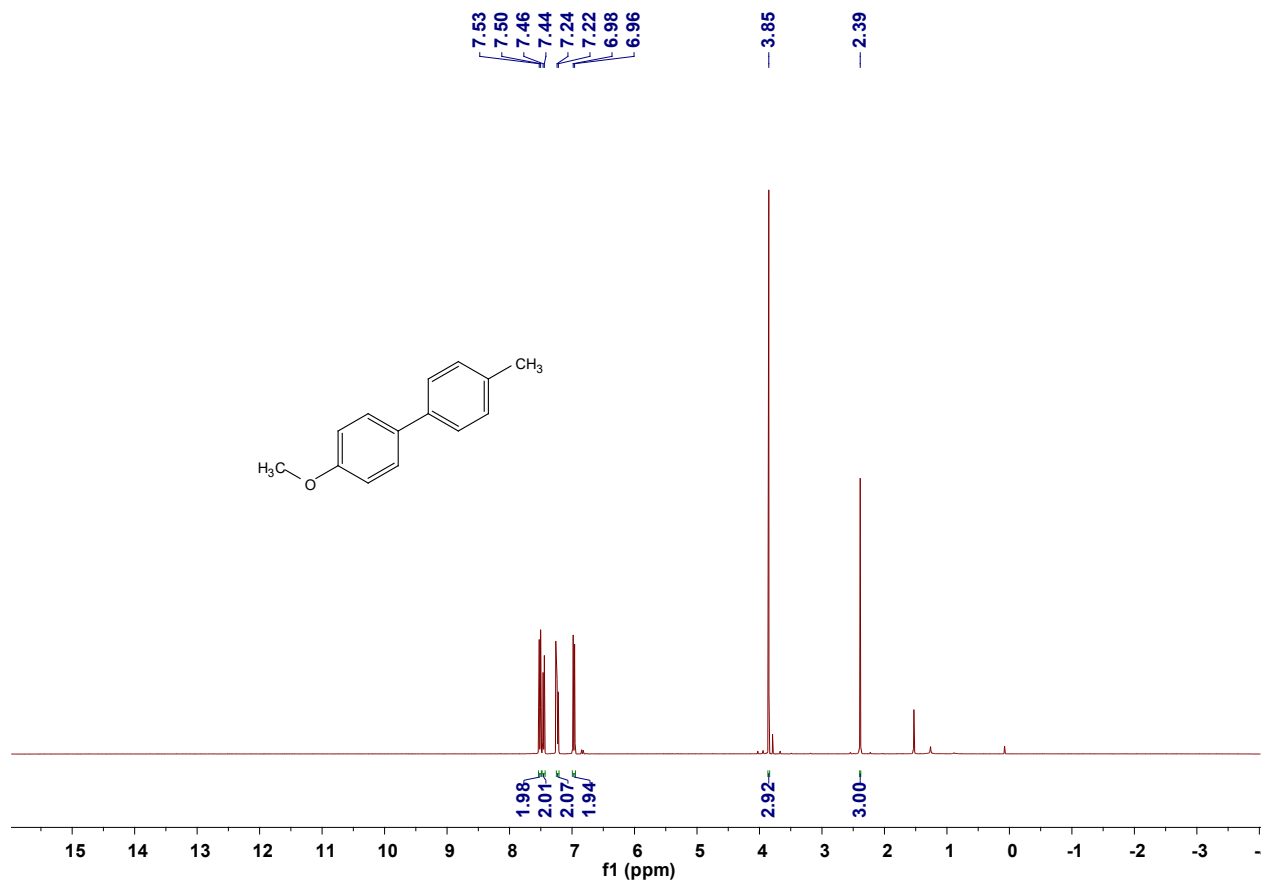

3f

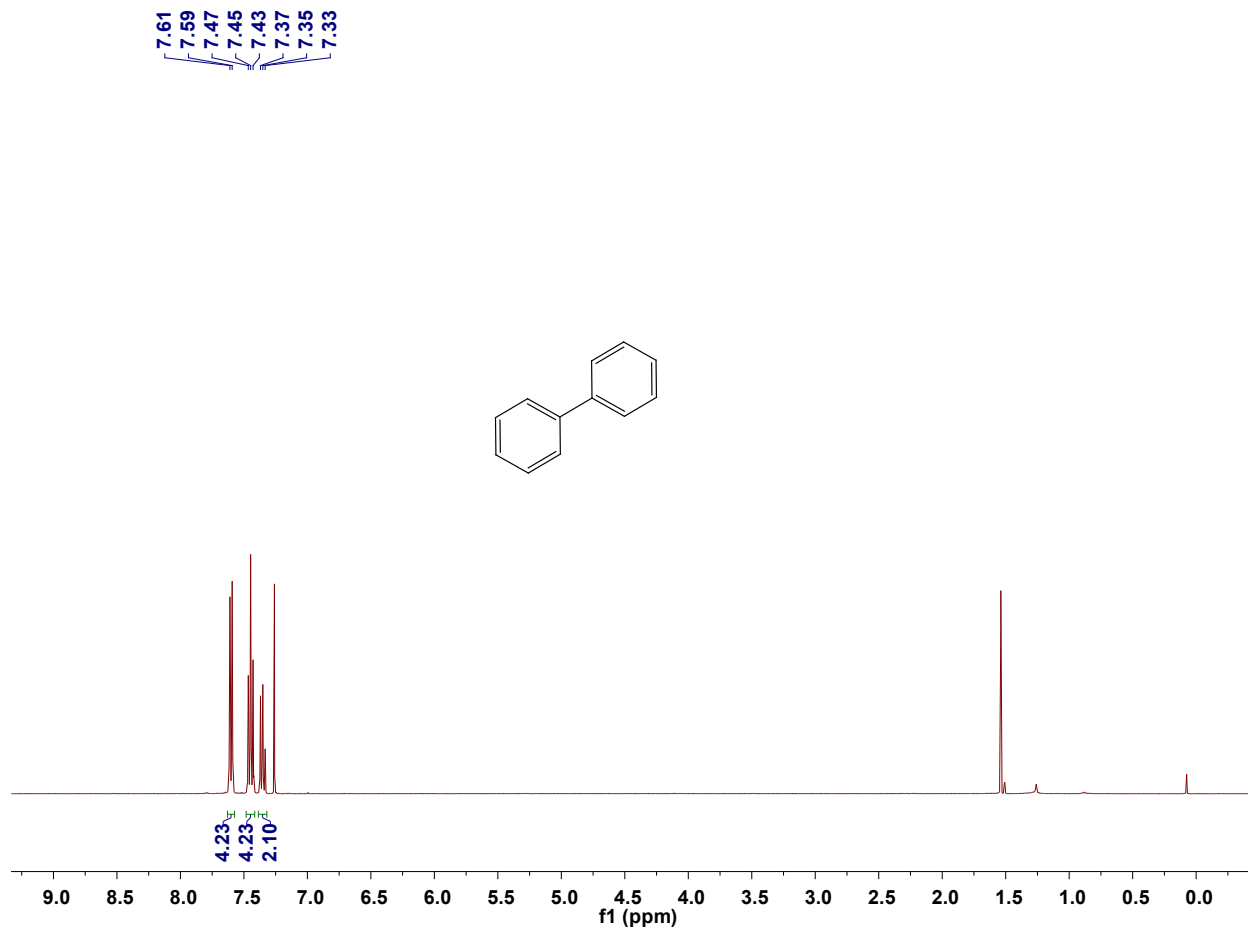

3g

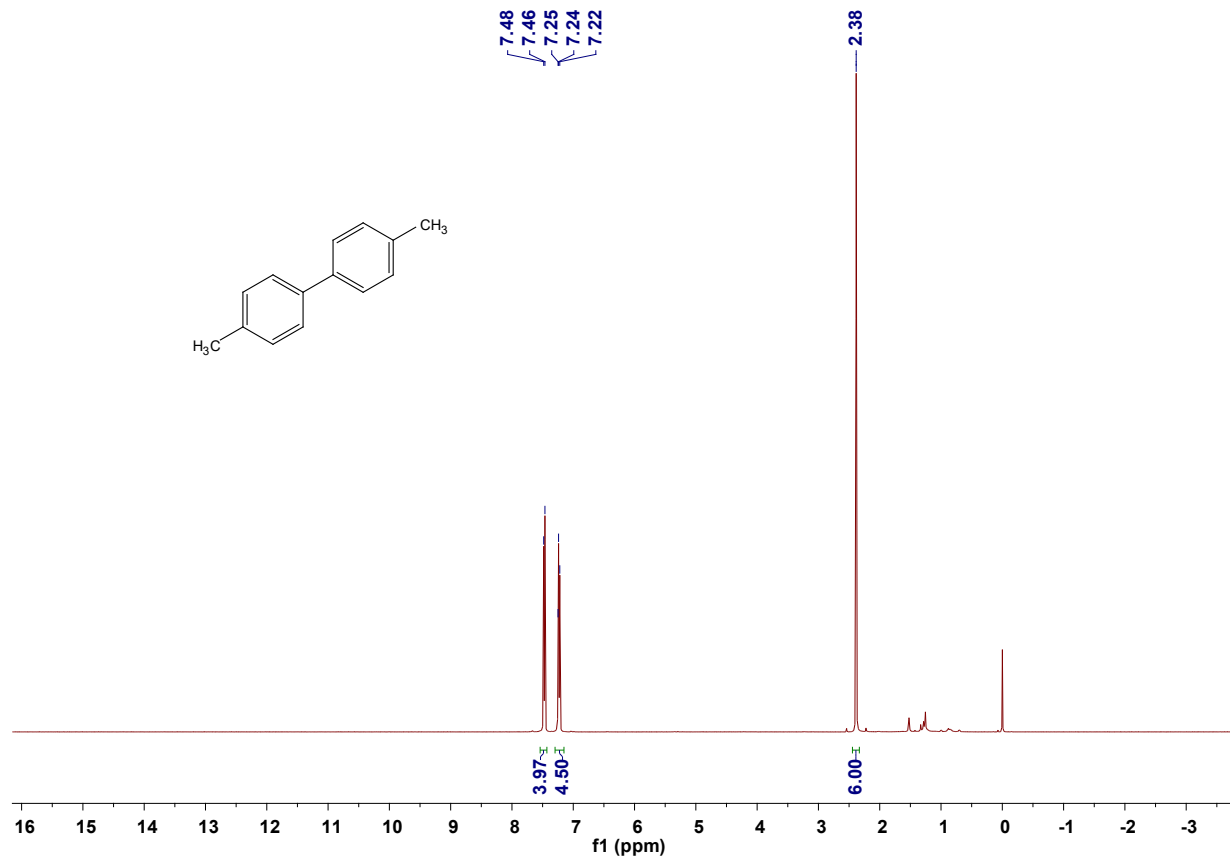

3h

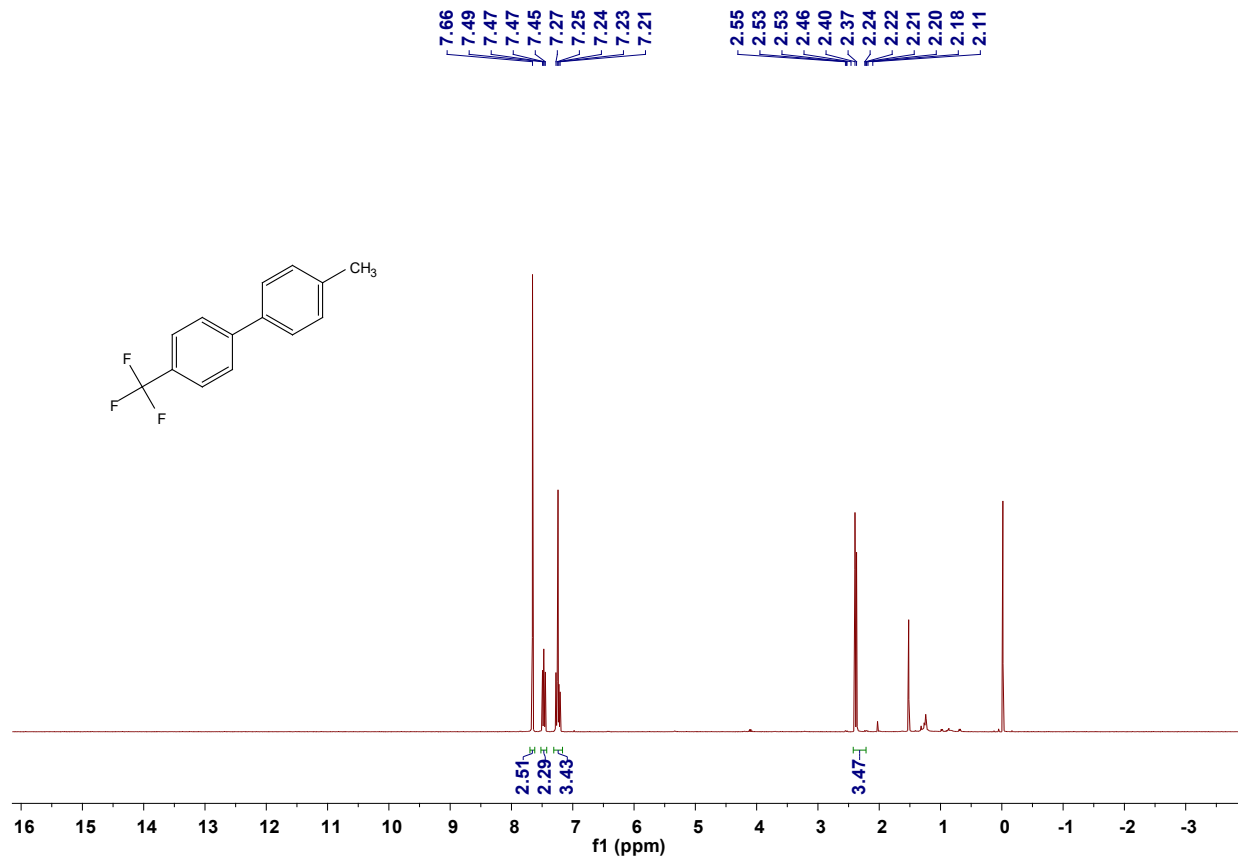

3i

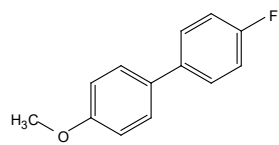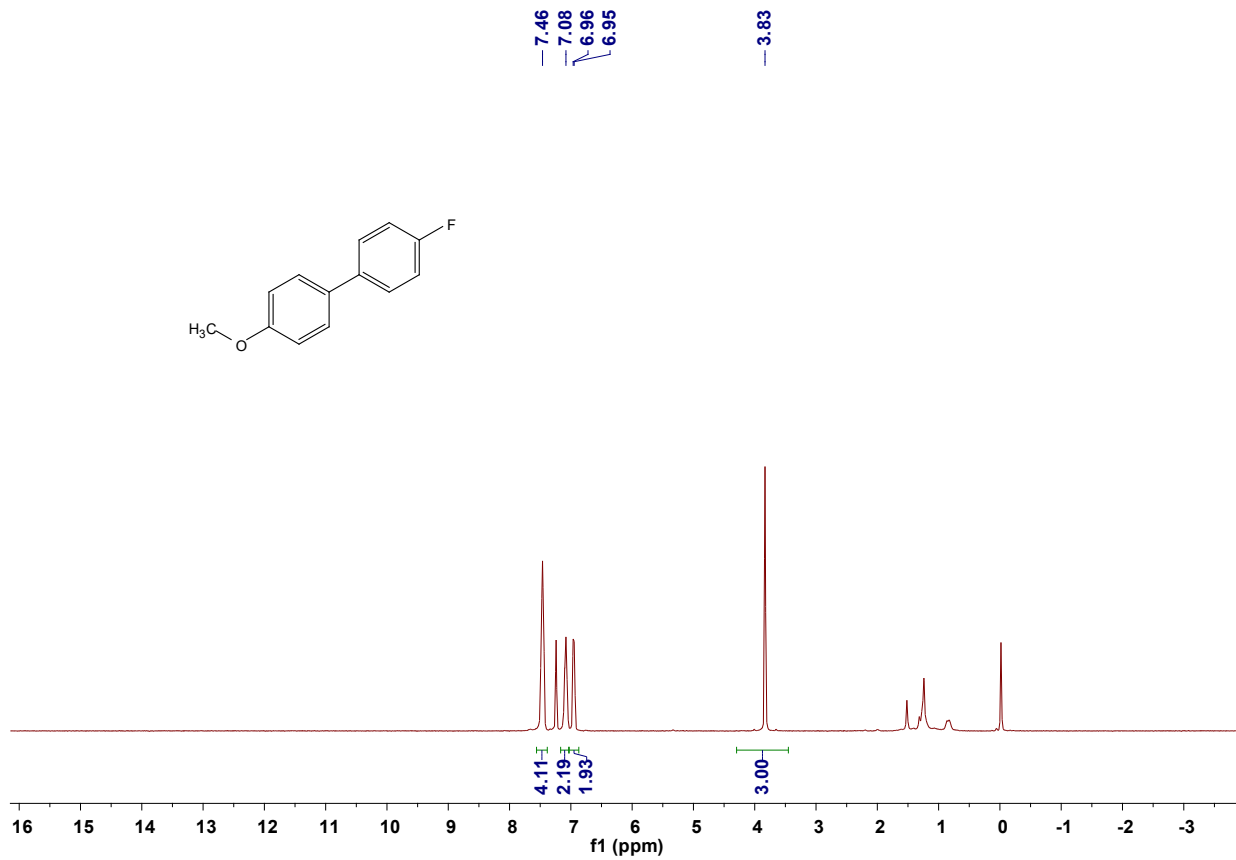

3j

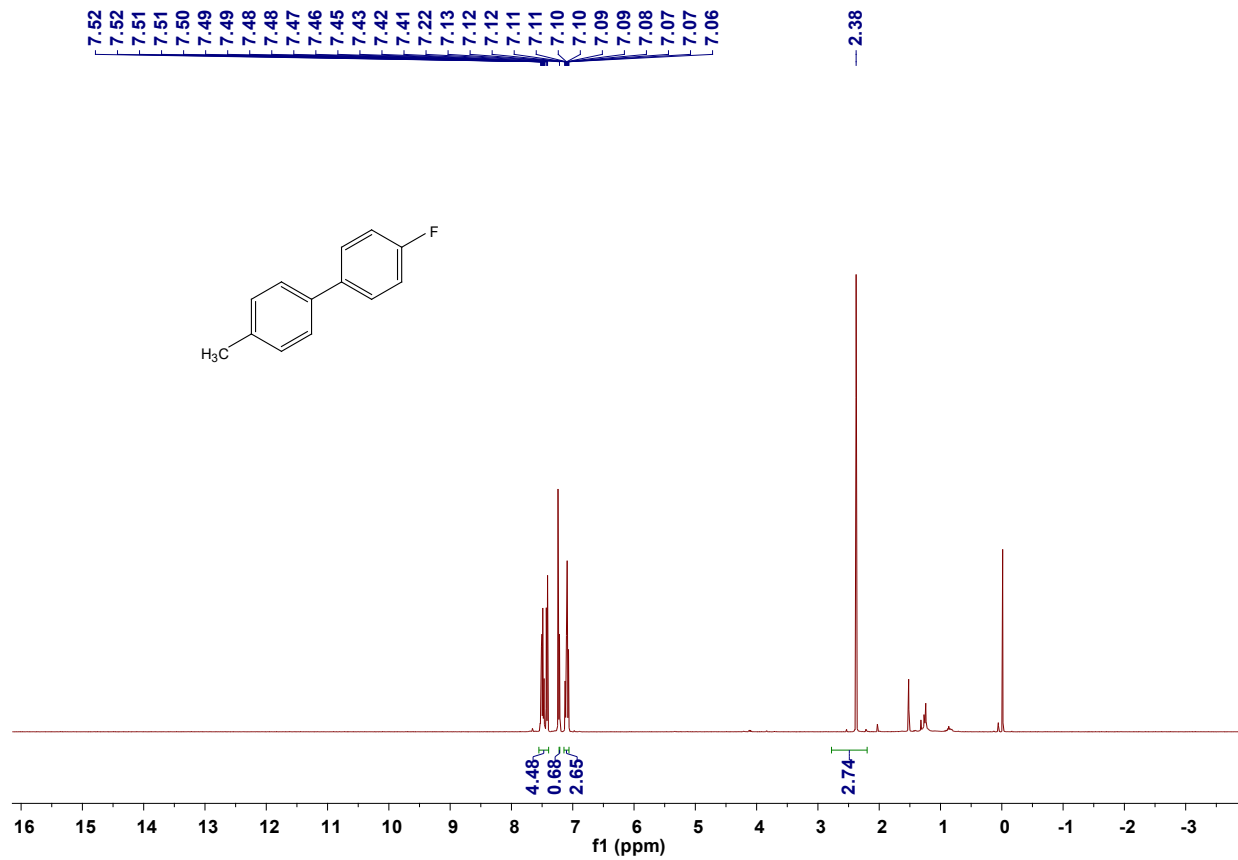

3k

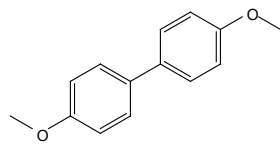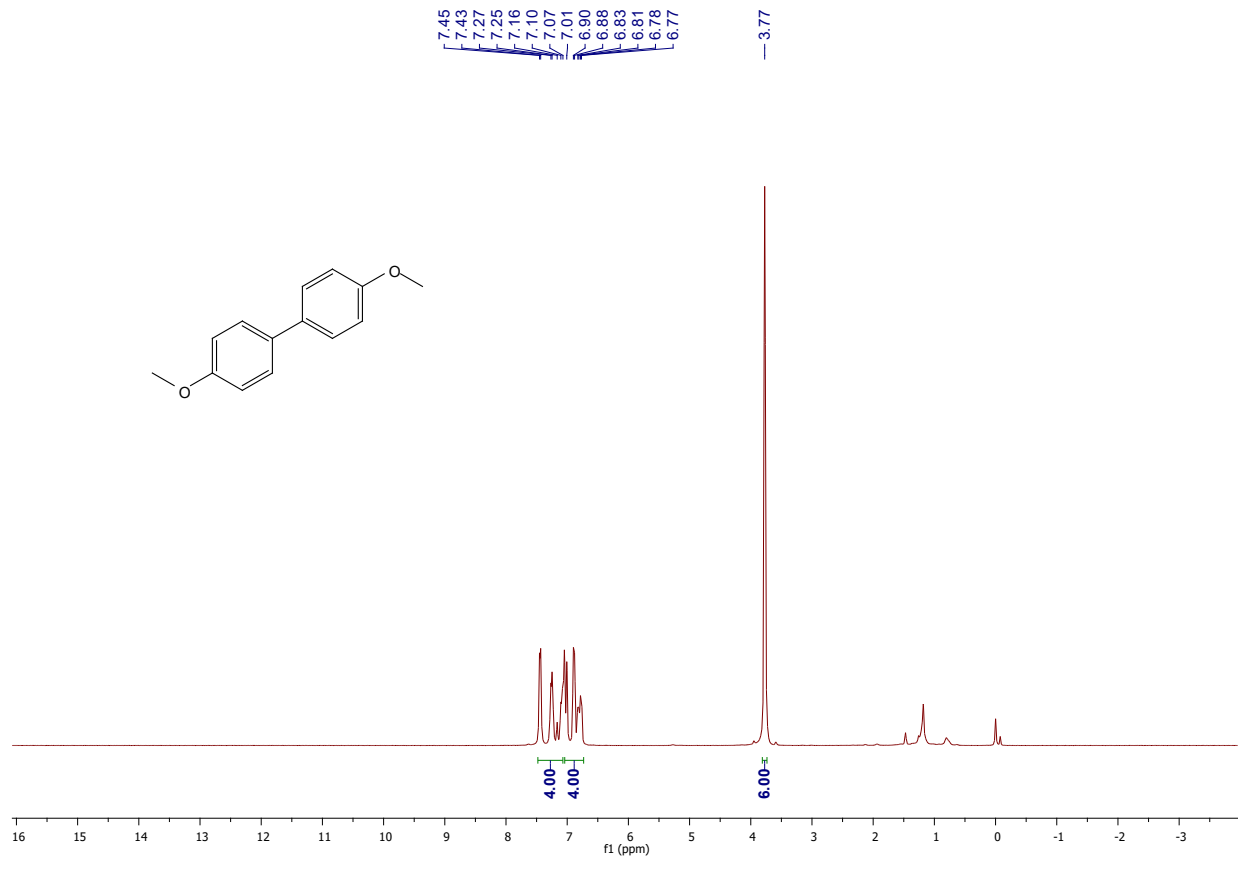

3l

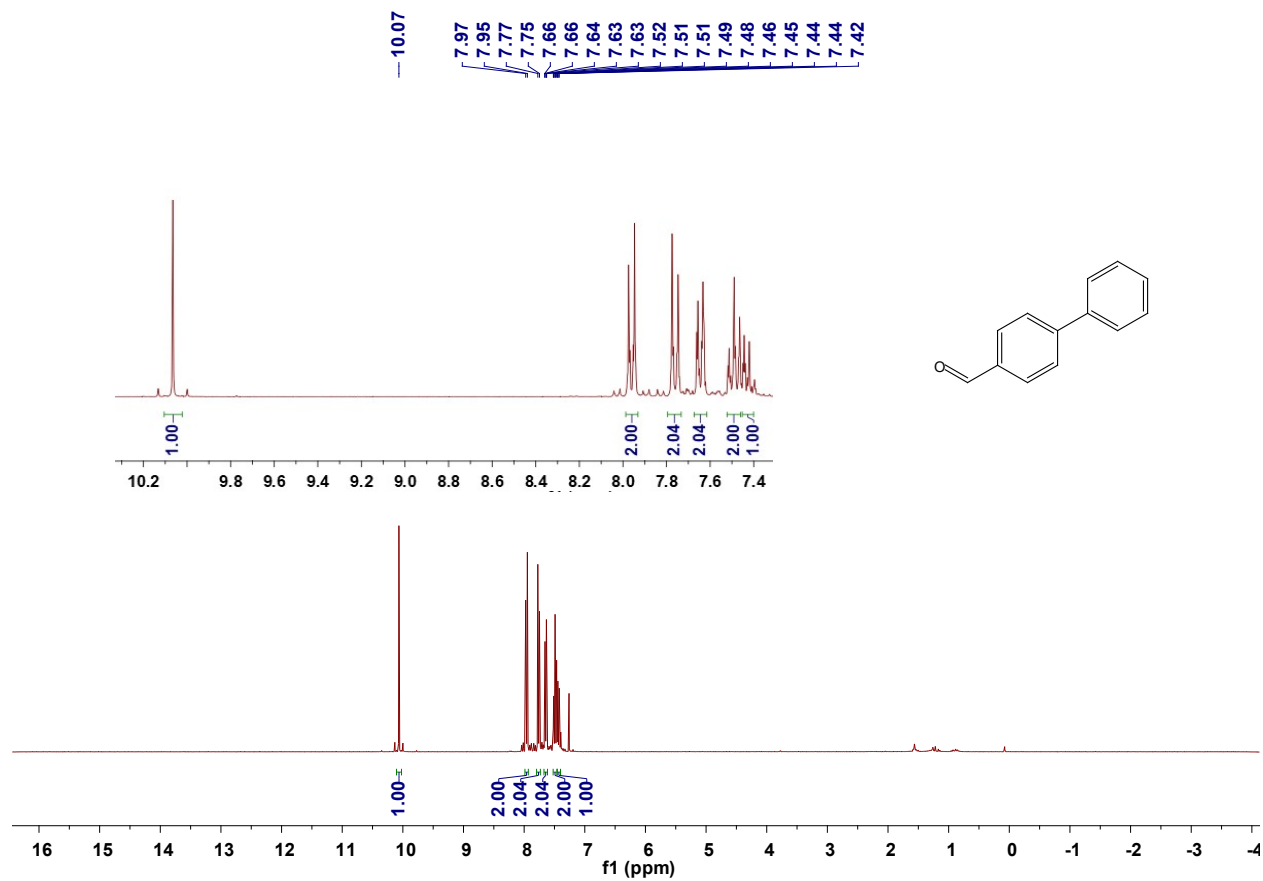

3m

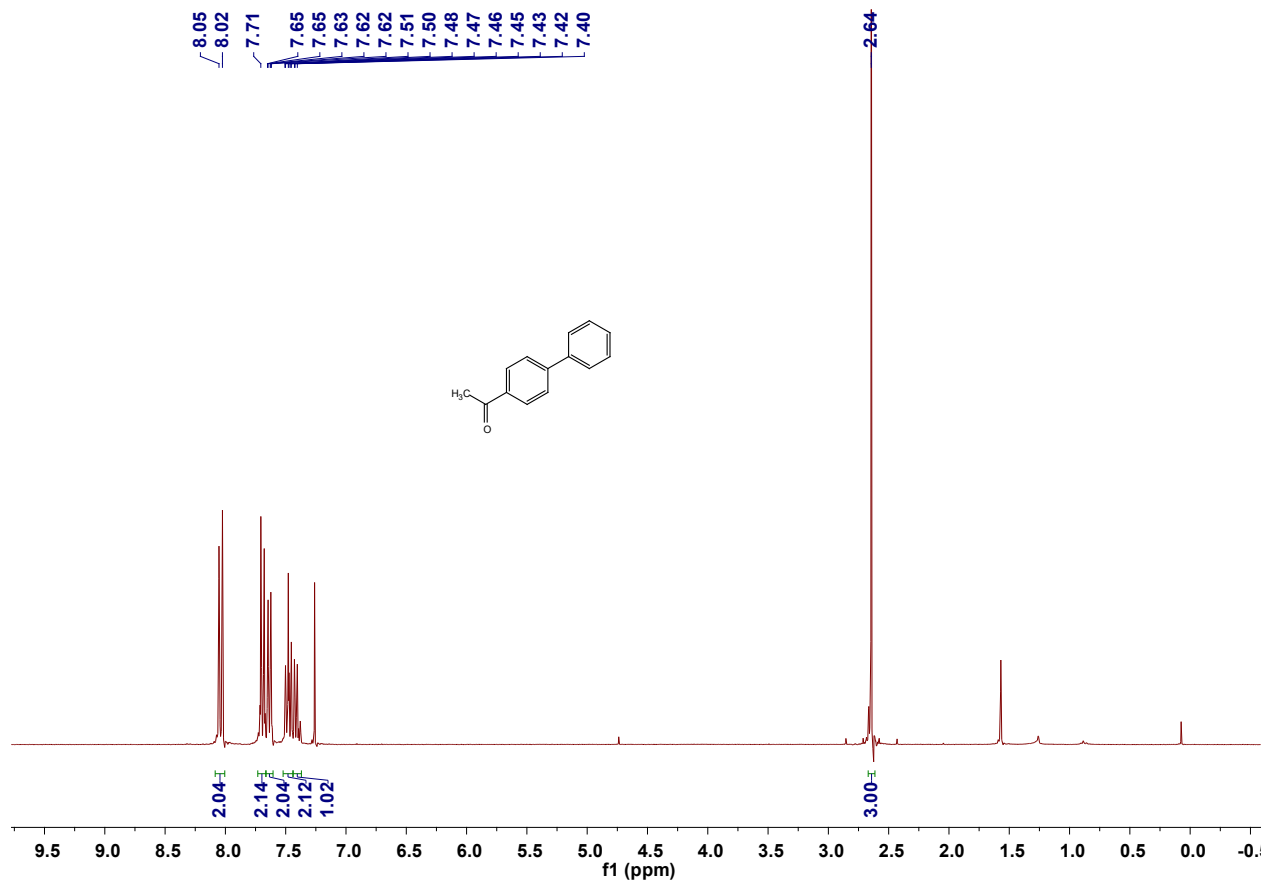

3n

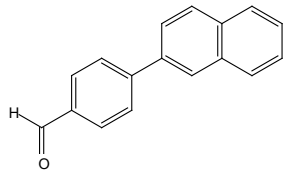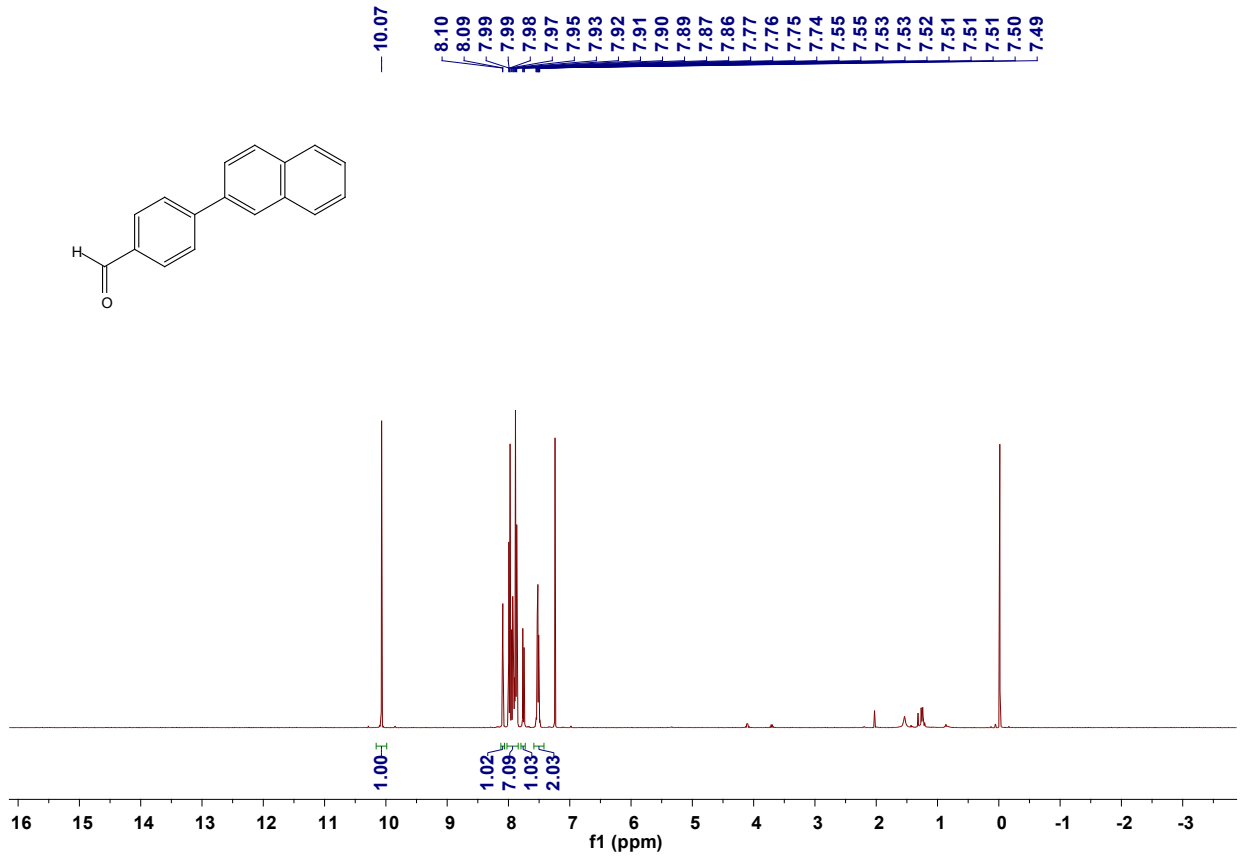

30

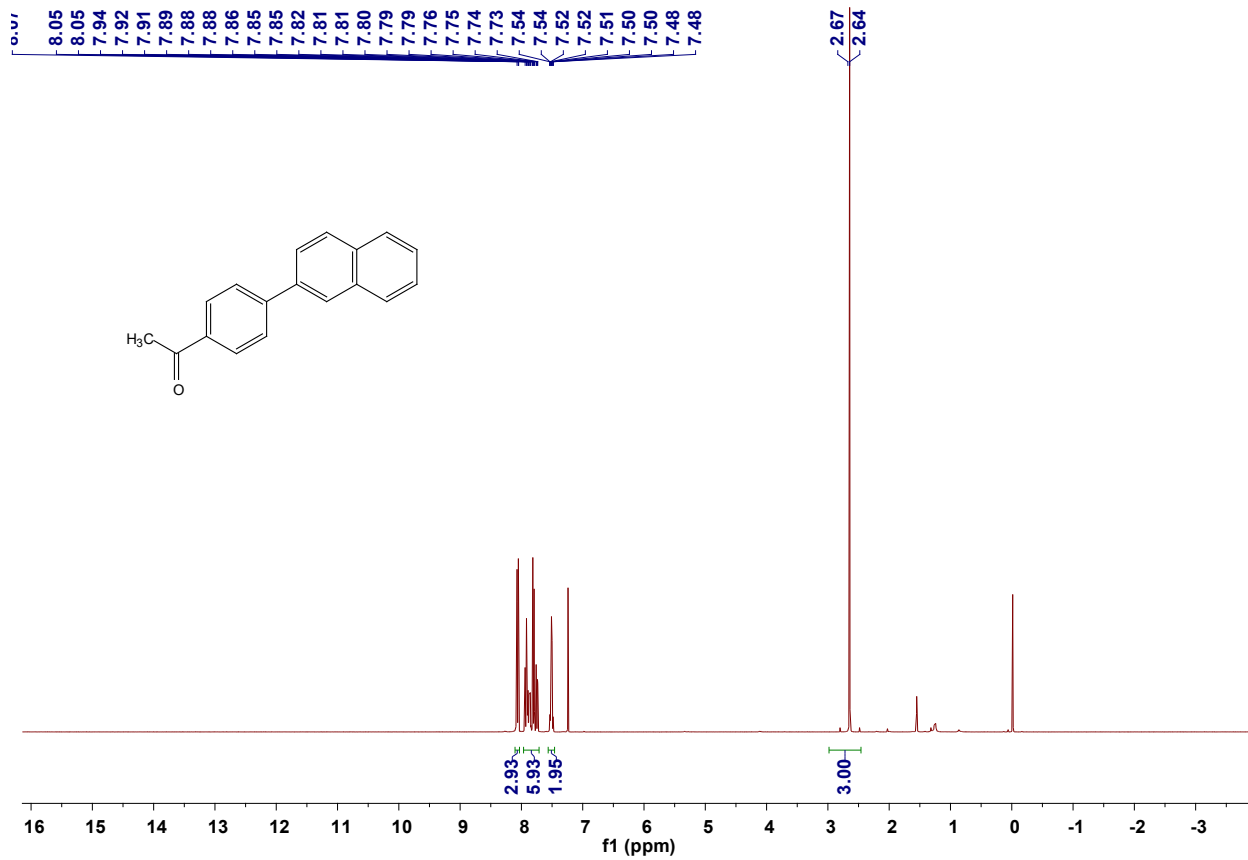

3p

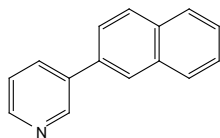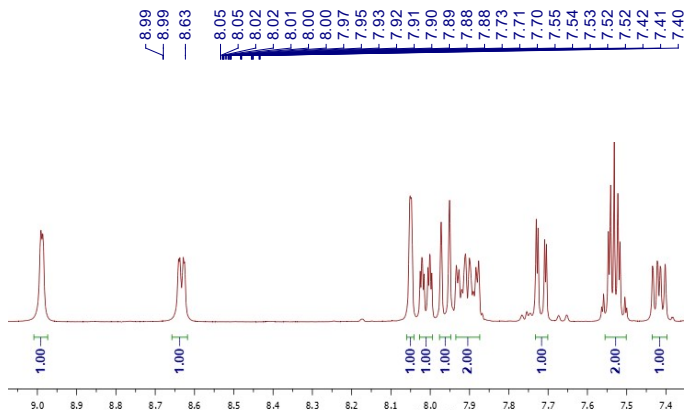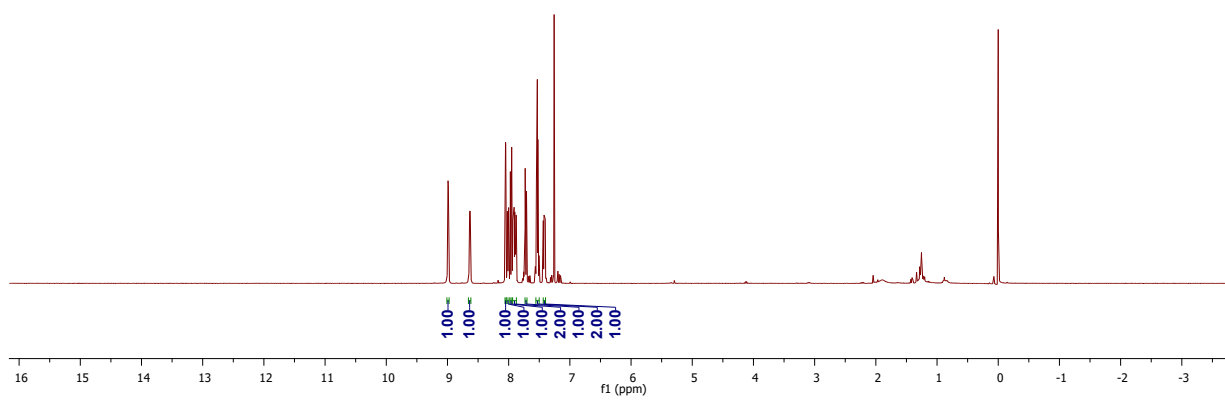

3q

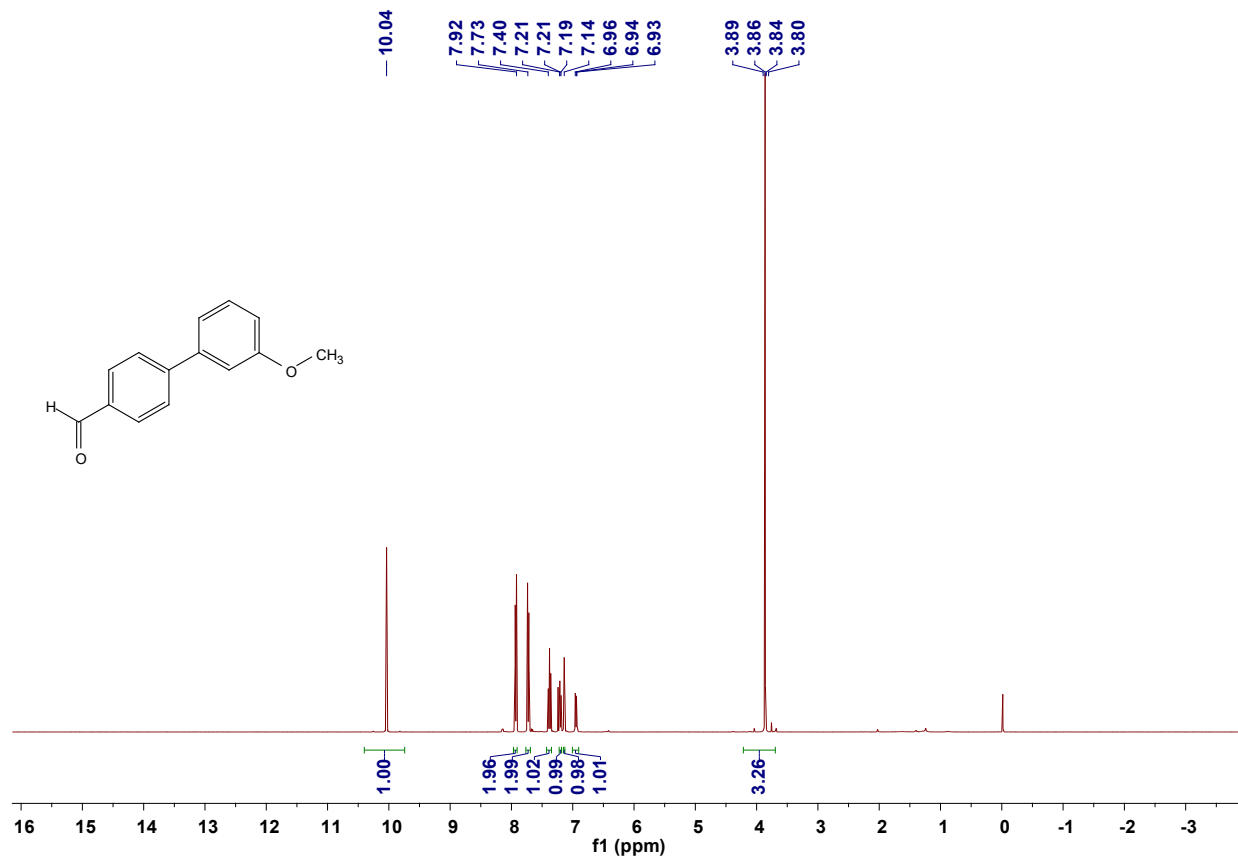

3r

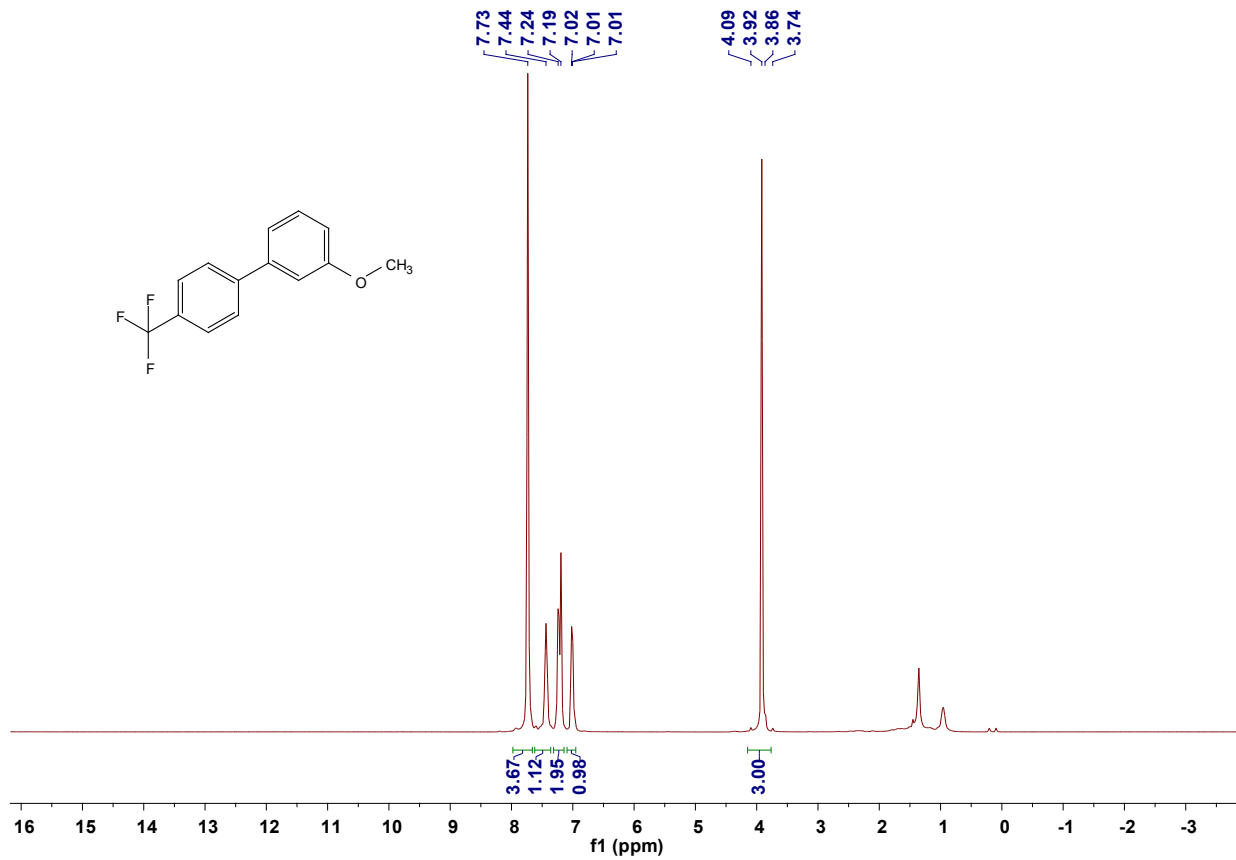

3s

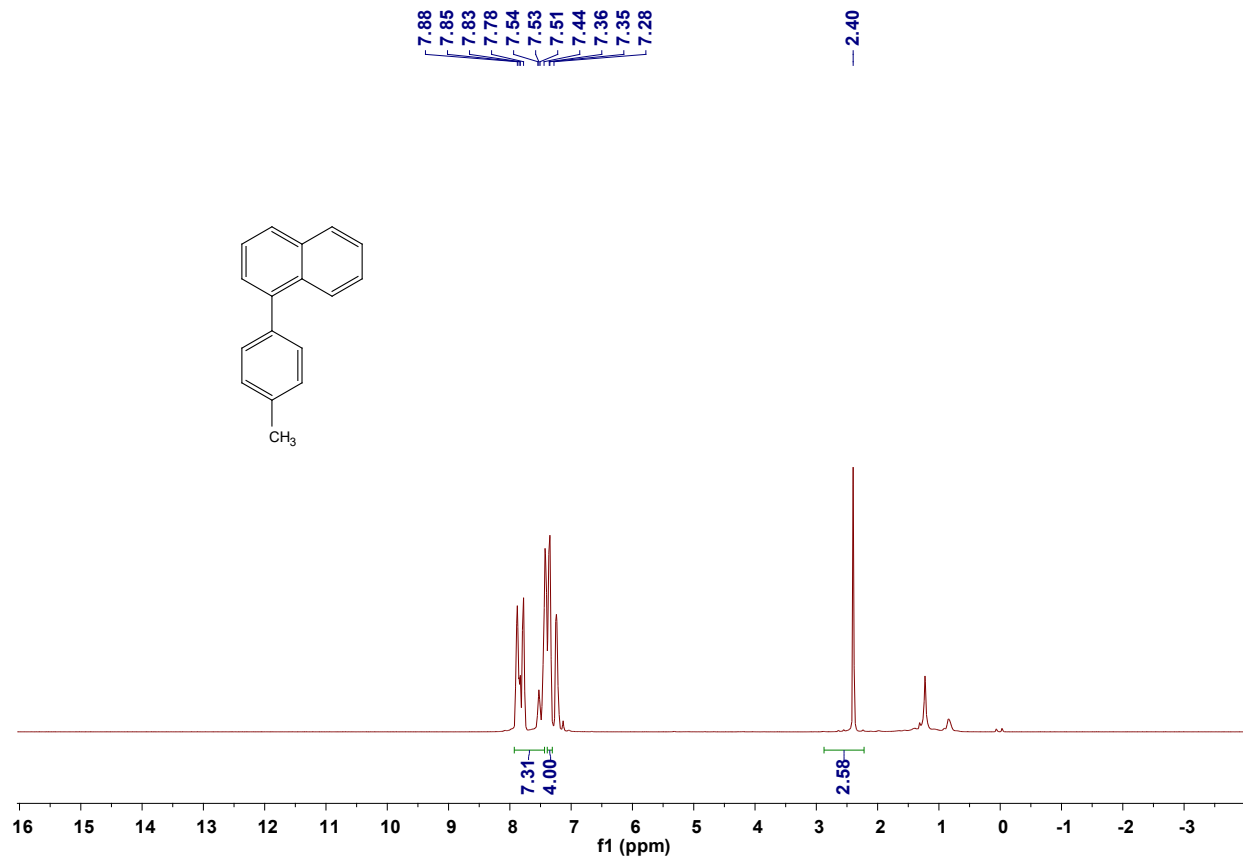

4a

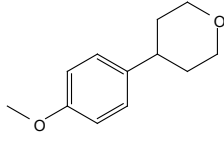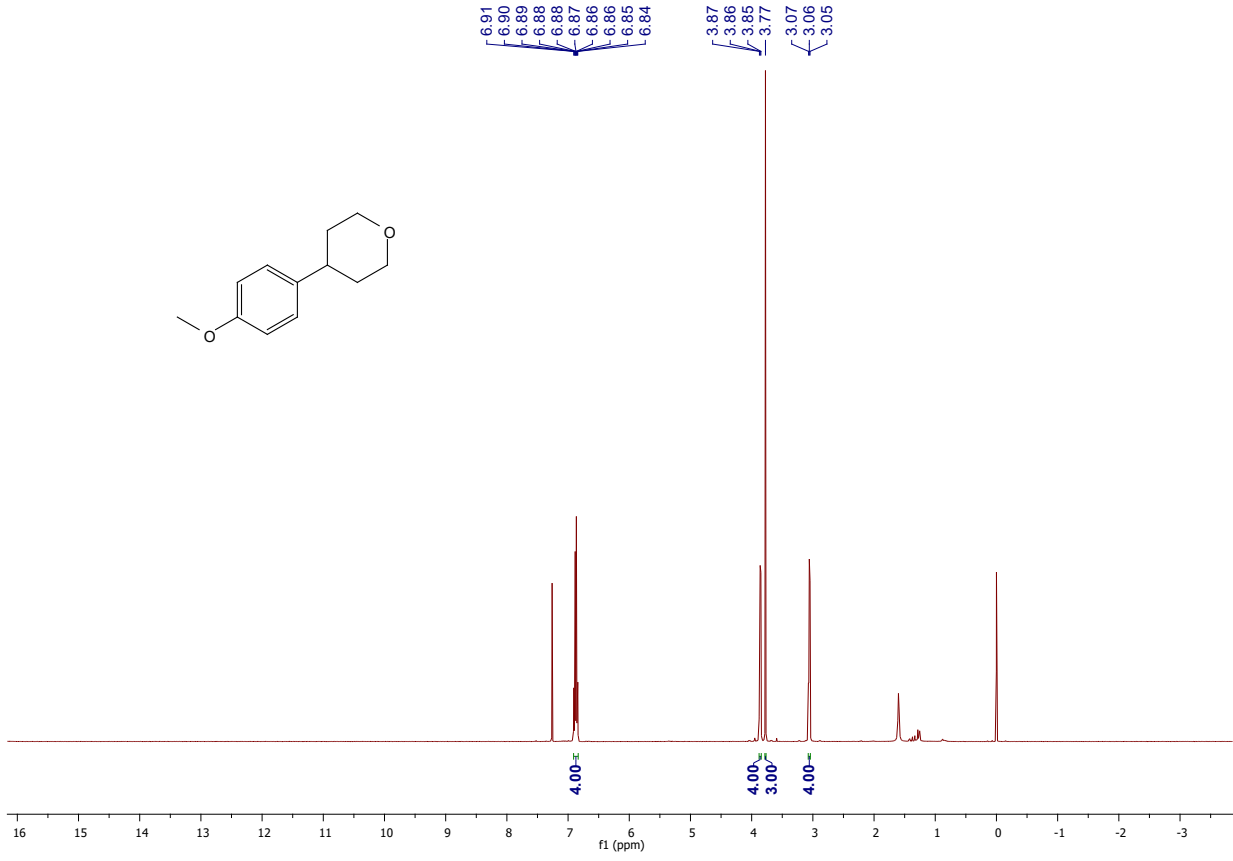

4b

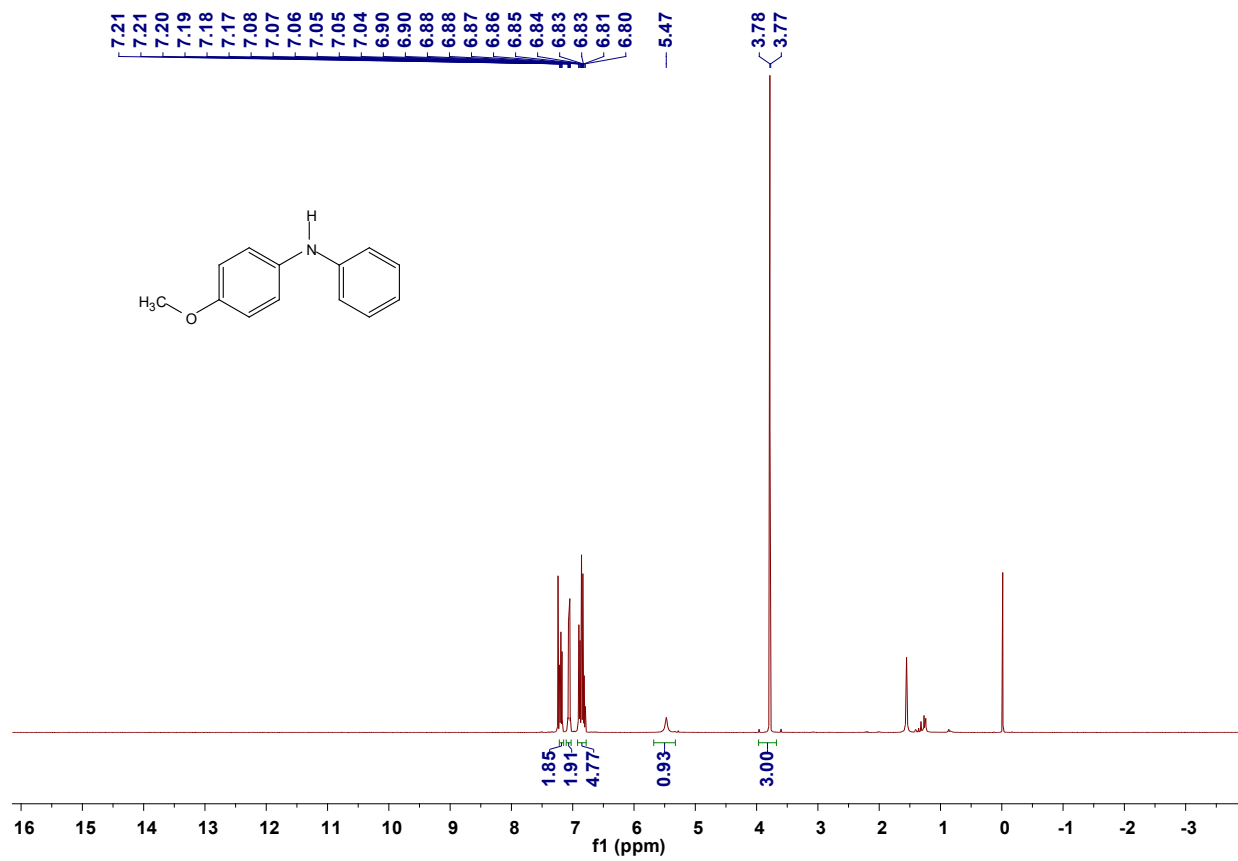

4c

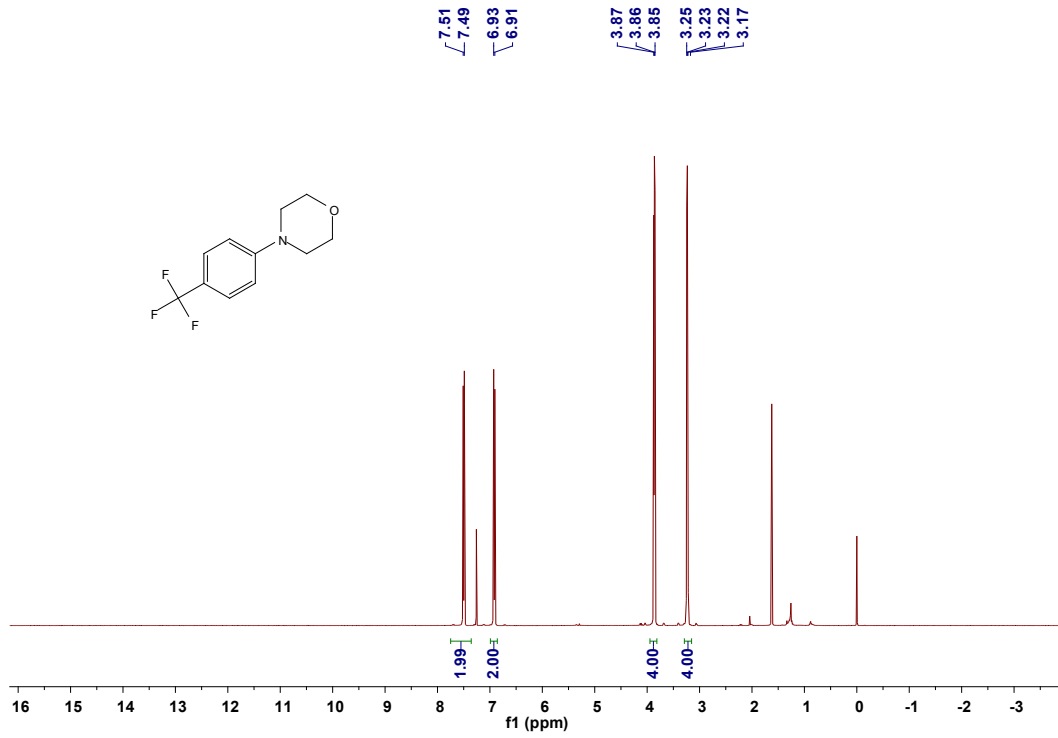

4d

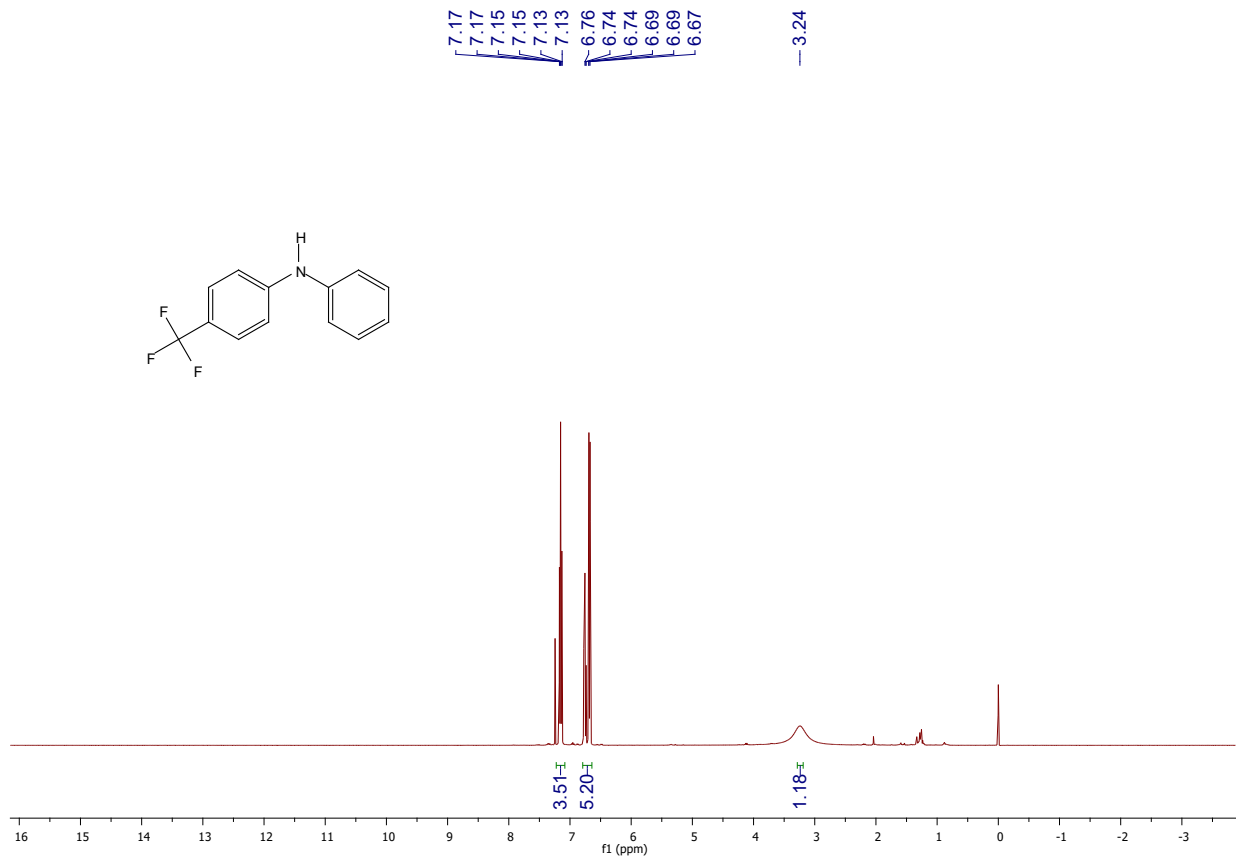

4e

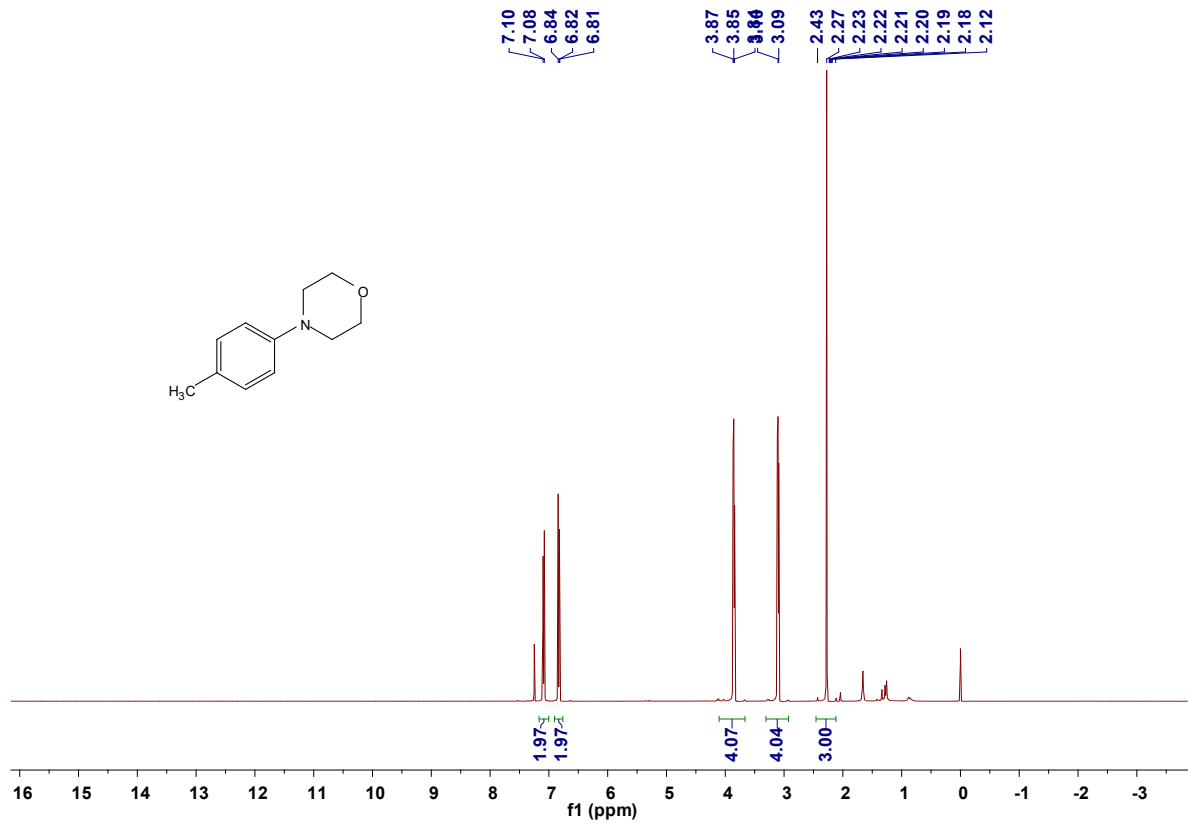

4f

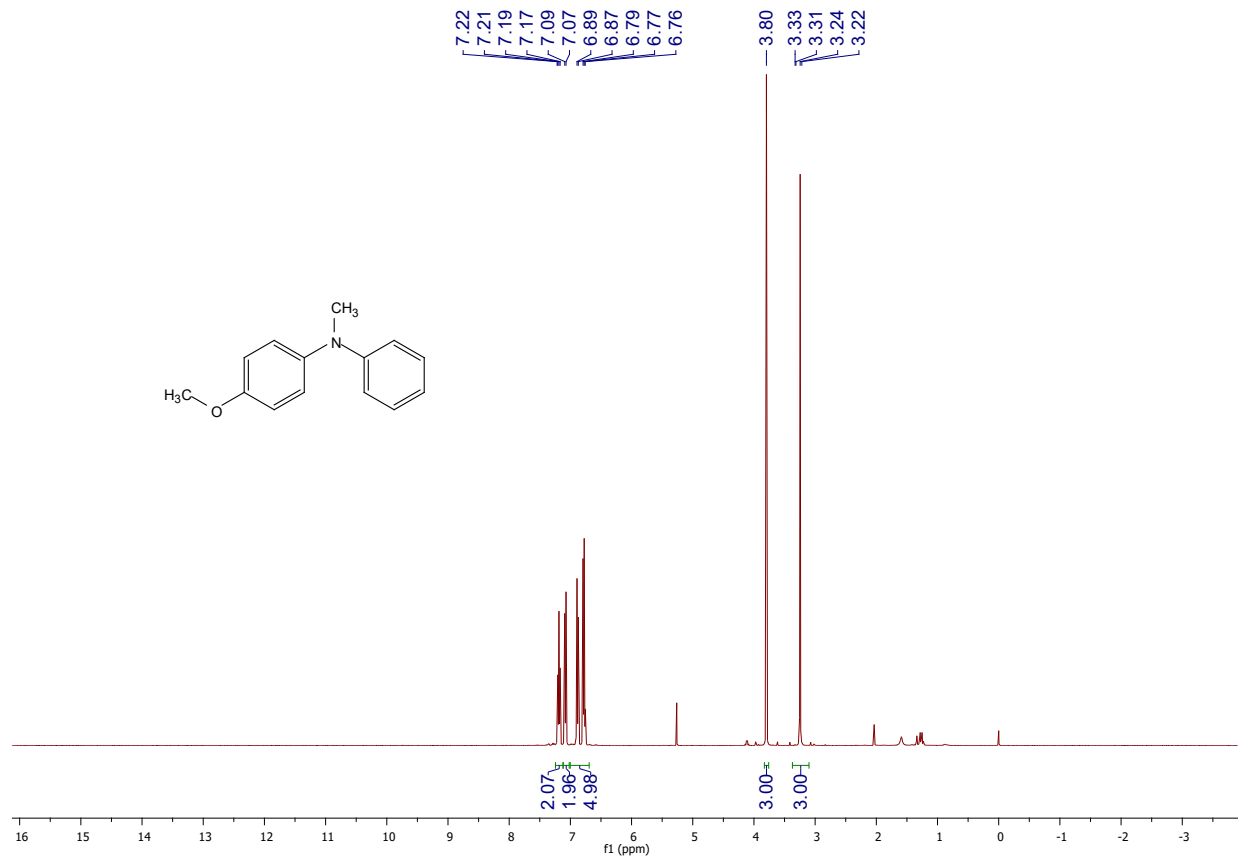

4g

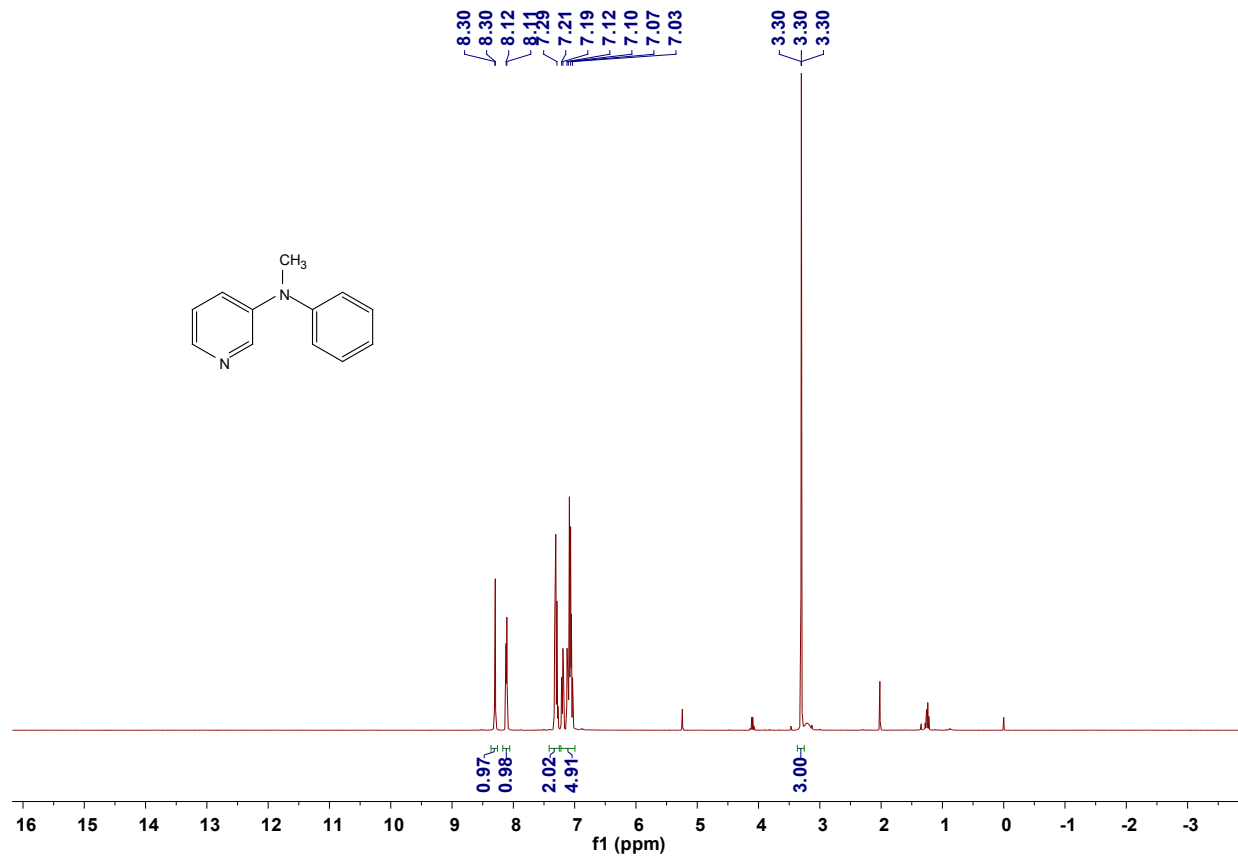

4h

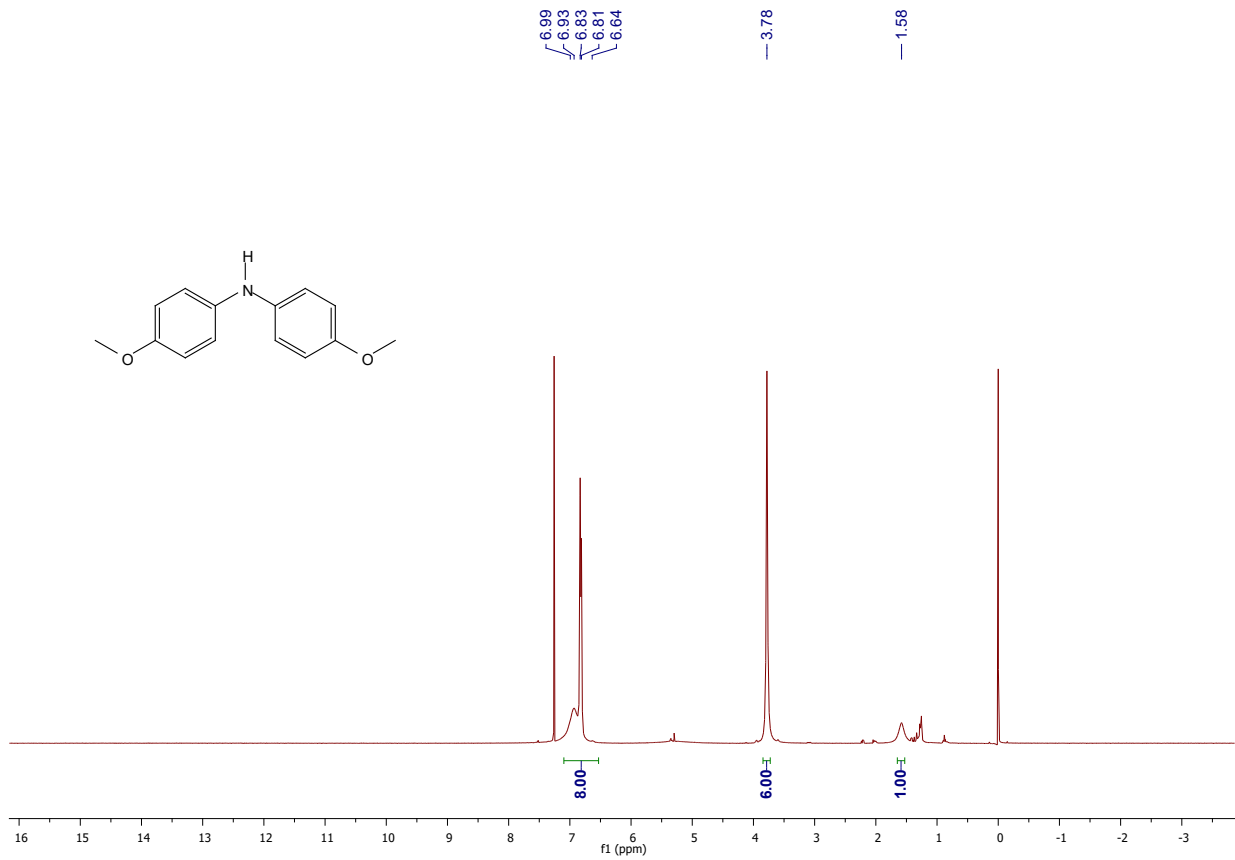

4i

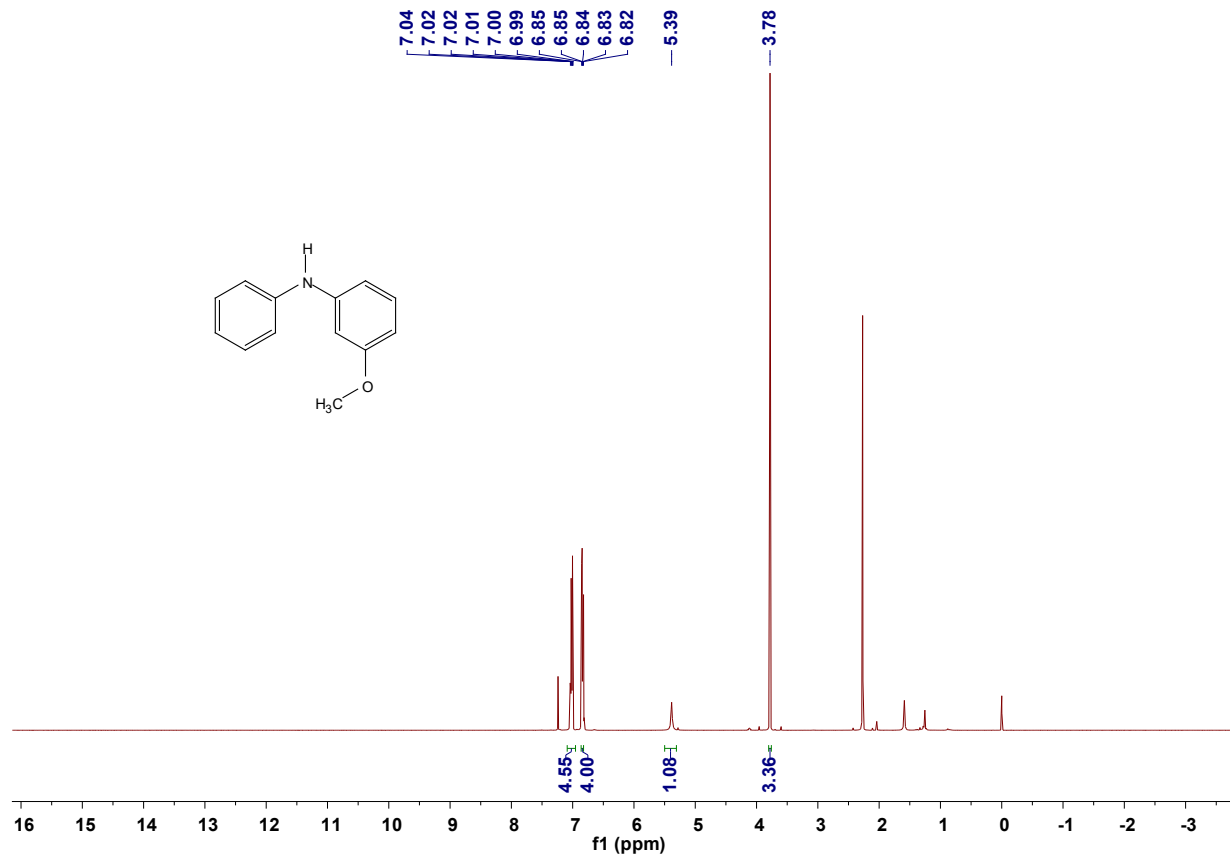

4j

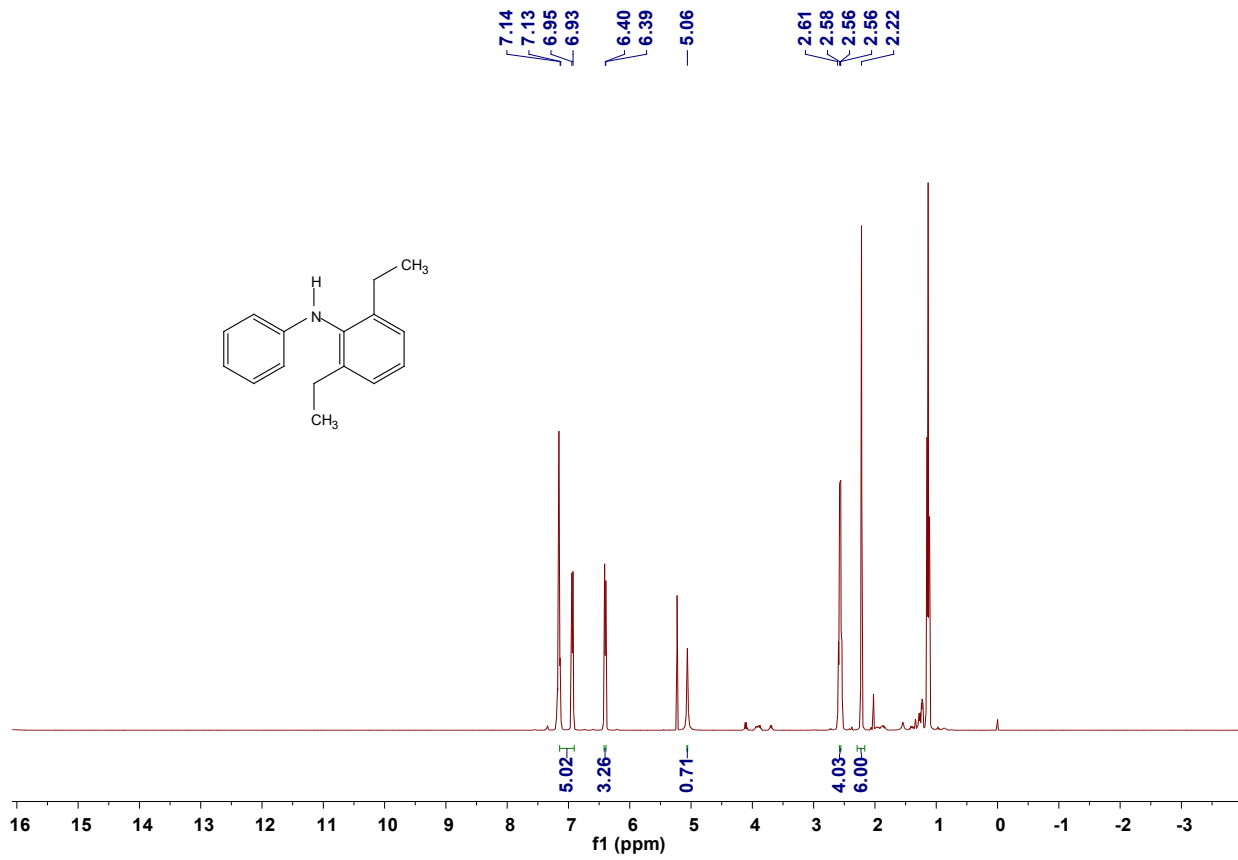

4k

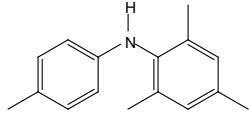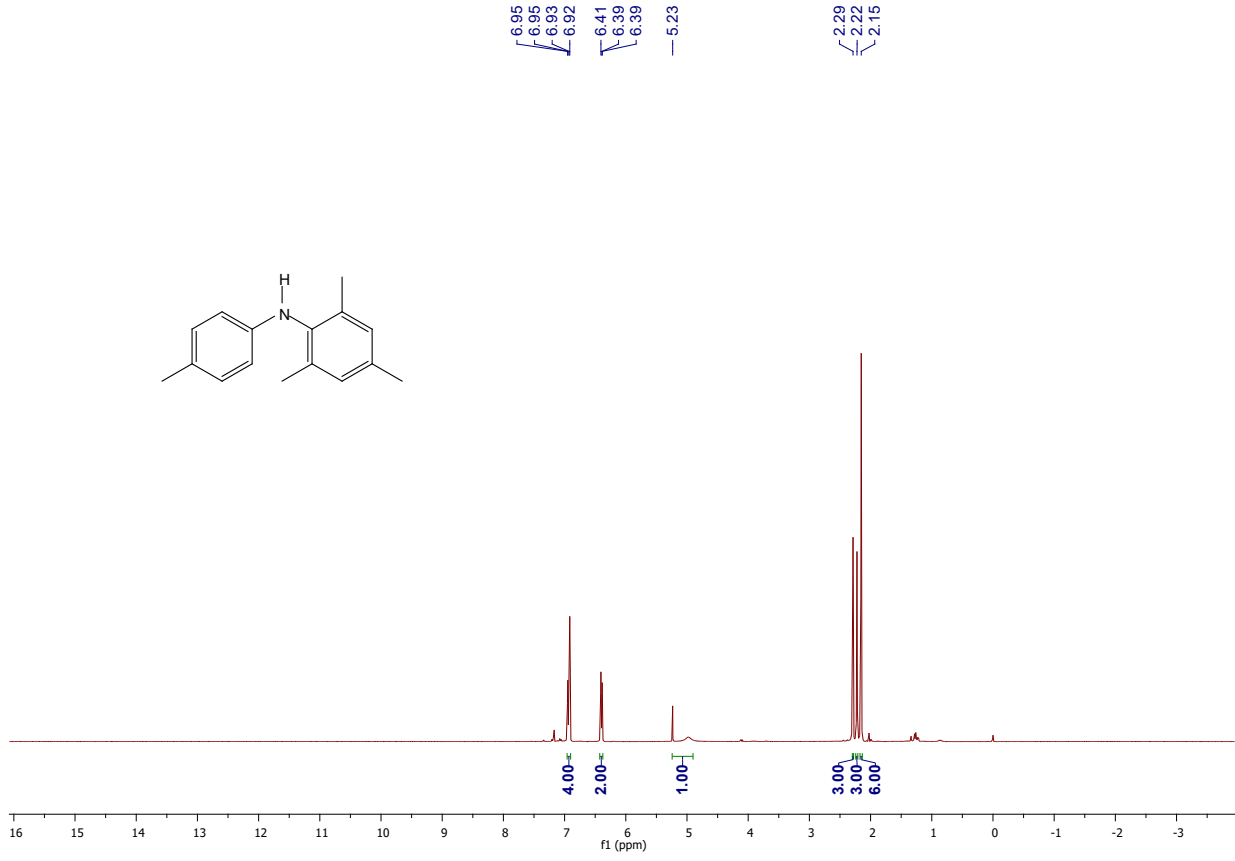

41

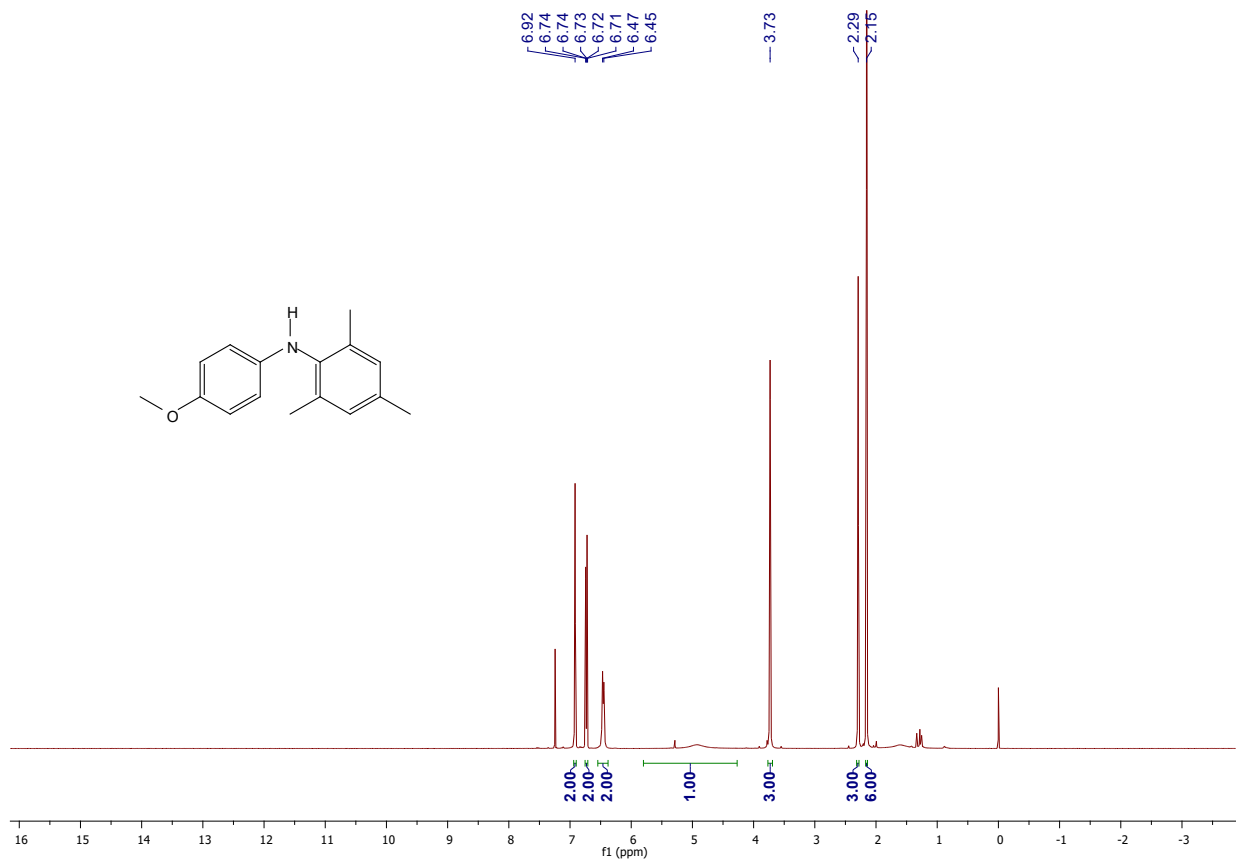

4m

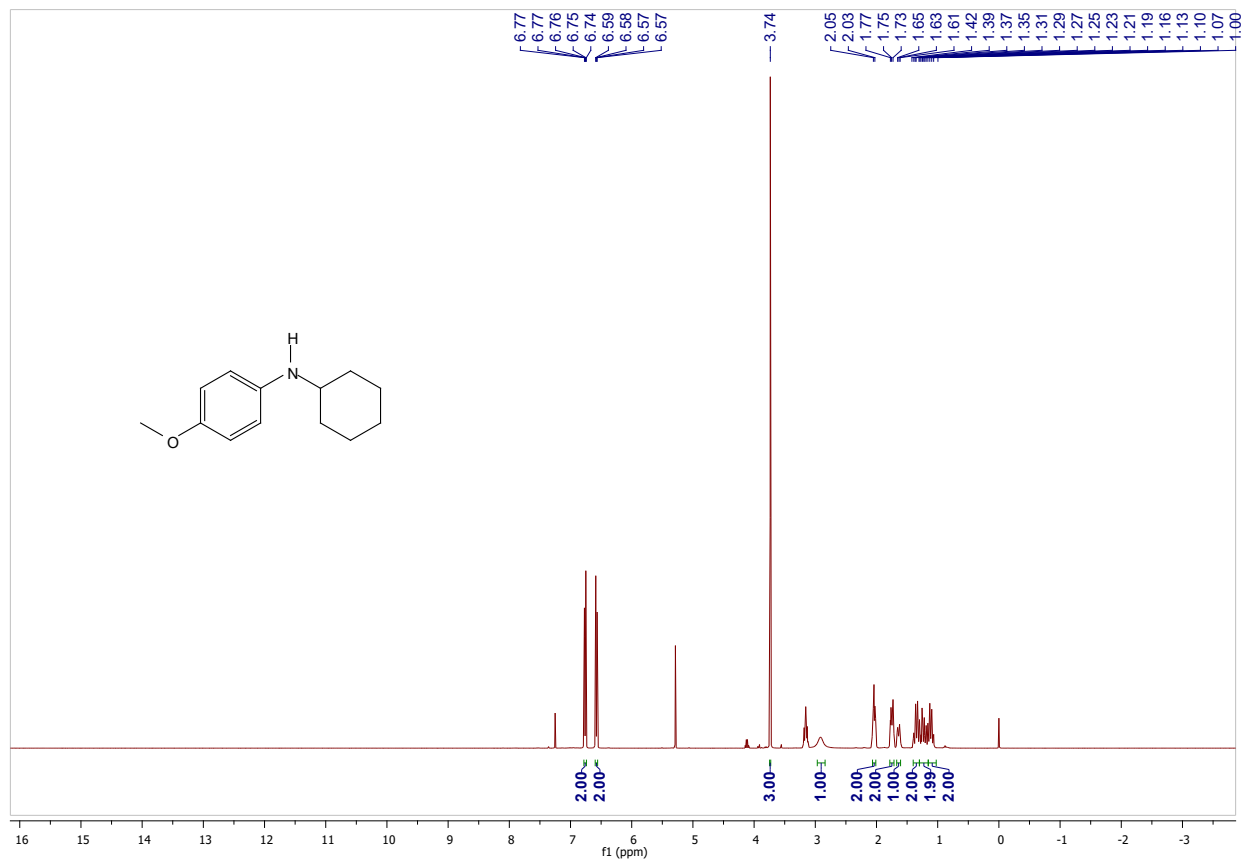

4n

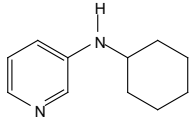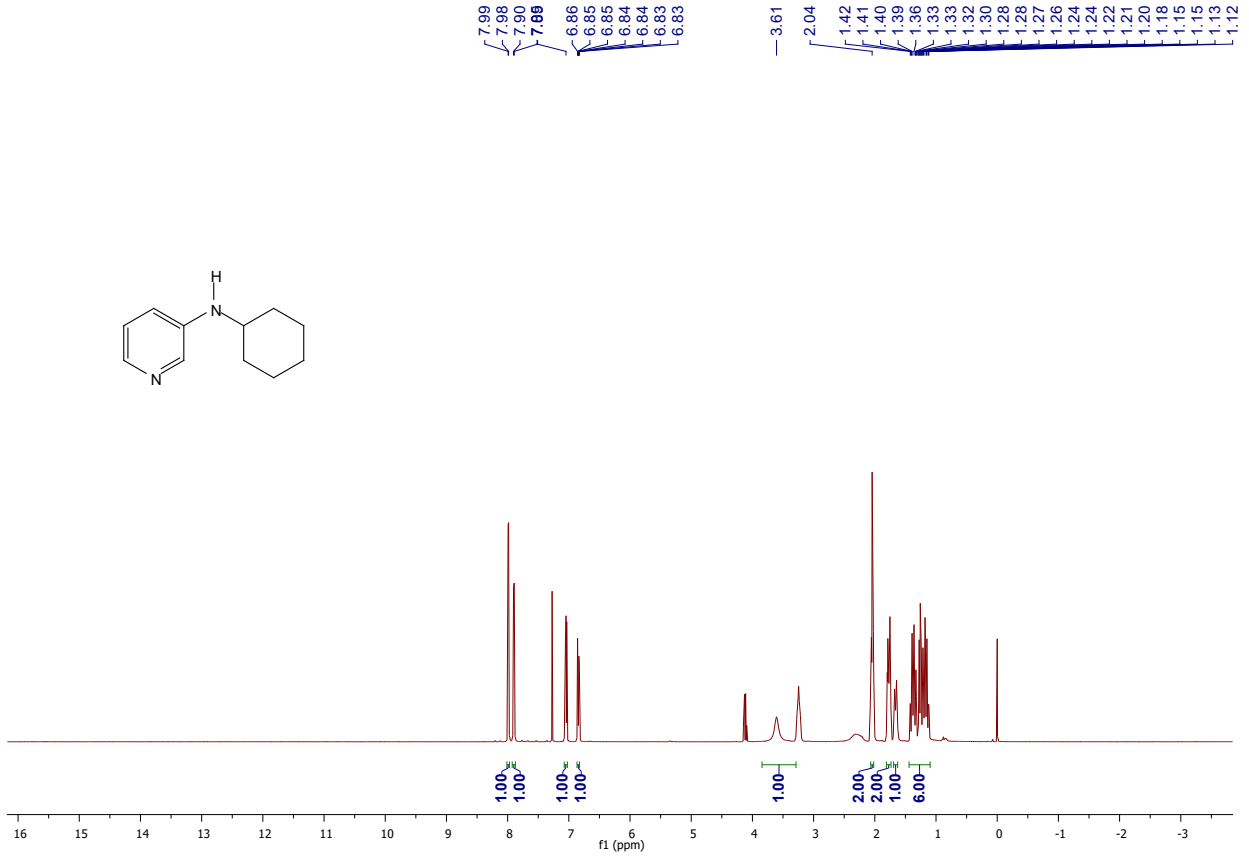

Supplement: d6ob00533k1.pdf [file d6ob00533k1.pdf]
